# Supplementary material
Source: PubMed Central journal article supplement (PMC5708541)
Supplement: NIHMS919368-supplement-Supplementary_Appendix.pdf [file NIHMS919368-supplement-Supplementary_Appendix.pdf]

# THE LANCET Global Health

## Supplementary appendix

This appendix formed part of the original submission and has been peer reviewed.  
We post it as supplied by the authors.

Supplement to: Jedy-Agba E, McCormack V, Adebamowo C, dos-Santos-Silva I.  
Stage at diagnosis of breast cancer in sub-Saharan Africa: a systematic review and  
meta-analysis. *Lancet Glob Health* 2016; **4**: e923–35.

## Web-Appendix

### Webappendix-Text 1: Systematic Review Protocol

**Title:** Stage at Diagnosis of Breast Cancer in Sub-Saharan Africa: A Systematic Review and Meta-analysis

**Reviewers:** Elima Jedy-Agba, Valerie McCormack and Isabel dos-Santos-Silva

#### Background

Breast cancer is by far the most common cancer affecting women worldwide<sup>1</sup>. In 2012, there were 1.67 million new cases of breast cancer constituting 25% of all cancers worldwide of which 883,000 new cases occurred in less developed regions<sup>2</sup>. Breast incidence rates in sub-Saharan Africa (SSA) are increasing, and although they remain among the lowest in the world, mortality rates from this disease are as high as those in high-income countries due to poor survival.

Stage at diagnosis is a major determinant of survival from breast cancer, with early disease (stages I/II) being associated with a better prognosis than late stage disease (stages III/IV). In high-income countries mortality rates from breast cancer have declined sharply in recent decades due to earlier stage at diagnosis, better diagnosis and improved treatment. However, in SSA where systems and facilities for accurate and timely diagnosis are scarce, the majority of breast cancer patients present late and are diagnosed at an advanced stage<sup>3-9</sup>, in part contributing to poor outcomes<sup>10-12</sup>. Variations in stage of breast cancer at diagnosis across SSA, and over time in some of its settings<sup>13</sup>, have been previously reported in individual settings<sup>3,7,11,14,15</sup> but, to our knowledge, have not been examined systematically across SSA.

In this study, we will systematically review the published literature on stage at presentation of breast cancer in SSA countries, examine trends over time, and investigate possible sources of between-study heterogeneity. The findings may help to identify locally-appropriate approaches for early detection and treatment of this disease.

#### Objectives

The main objective of this review is to ascertain the distribution of stage at diagnosis of breast cancer patients in SSA.

The specific aims of the systematic review are:

- (i) To provide an overview of stage at diagnosis of breast cancer across SSA;
- (ii) To identify and investigate the extent and sources of variations in stage at diagnosis of breast cancer across SSA and over time;
- (iii) To compare the frequency of late stage breast cancer in SSA to the corresponding figures for Black and White women in the US over a similar time period.

#### Search Strategy

The search strategy will aim to identify all published studies conducted in SSA on stage at diagnosis of breast cancer.

#### *Inclusion criteria*

Studies will be included if they met the following inclusion criteria:

- Studies that reported on the distribution of stage at diagnosis of primary invasive breast cancer in women in any sub-Saharan African country (as defined by the United Nations<sup>16</sup>);
- Studies conducted and published before 1<sup>st</sup> January 2014;
- Studies published in any language (no language restrictions will be imposed);

#### *Exclusion criteria*

Studies will be excluded if they were:

- Not conducted in humans;
- Not conducted in SSA (articles from North Africa – i.e. Algeria, Egypt, Libya, Morocco, Sudan, Tunisia, Western Sahara – and those among African-Americans will be excluded);
- Studies with no information on breast cancer;
- Studies which included only male patients \*;
- Meeting abstracts, review papers, reports, and commentaries;
- Studies whose eligibility criteria restricted patient entry to those with a particular stage (e.g. metastatic breast cancer only).

\* Studies that include both male and female breast cancer cases recruited over a given period of time will not be excluded even if data are not presented separately by gender because the number of male cases is expected to be rather small.

### **Database searches**

The databases to be searched will include:

- EMBASE
- Medline
- Web of Science
- Africa Wide Information (including African Journals Online)

Only these four databases will be searched as it is expected that saturation will be reached with the majority of studies appearing in all databases.

### **Search Terms**

Keywords and Medical Subject Headings (MeSH) will be used to search the databases listed above. Broad search terms such as “breast cancer”, “Sub-Saharan Africa or SSA” will be used. A complete list of search terms will be developed and used across all four databases [see Webappendix-Text3]. Hand-searching of references from retrieved articles, meeting abstracts, review papers, reports and commentaries will also be performed to identify any additional papers not captured by the electronic searches.

### **Title and abstract screening**

The databases listed above will be searched and the citations retrieved will be downloaded into the Endnote software. Any duplicate articles identified by more than one data will be removed.

The titles and abstracts will be screened by one reviewer, with a random sample being also screened independently by a second reviewer. Any study excluded from the review will be documented and the reason(s) for exclusion noted in a systematic way.

### **Full text screening and data extraction**

The full text of all the papers identified during the abstract screening step will be retrieved for full text screening to confirm eligibility and, if eligible, to extract relevant data. For each eligible paper data will be abstracted on the number of patients with breast cancer who presented in each one of the four stages (I, II, III and IV) or in early (i.e. stages I and II combined) and late (i.e. III and IV combined) stages if data were only presented in these aggregated categories. If a study provides numbers of patients in each specific American Joint Committee Cancer Tumour Node Metastases (TNM) category (e.g. T2, N0, M0) these will also be extracted. Information on the following variables will also be extracted: country, study design, study population and type of clinical setting (e.g. primary, secondary, tertiary, population-based cancer registry), years when breast cancer patients were diagnosed, age at time of diagnosis, methods and classification used to ascertain tumour stage. Whenever available data will also be extracted on reproductive history (e.g. age at menarche, age at first birth, parity and menopausal status at presentation); tumour’s characteristics (e.g. histology, size, grade, node positivity, receptor status); and time from first symptoms to breast cancer diagnosis. In the course of the data abstraction, should there be any eligible papers resulting from the same study, only the one with the most complete information on stage will be included in the systematic review. The full-text of any potentially eligible studies identified through hand searches will also be reviewed using the methodology described above.

The full-text review and data extraction will be done independently by two reviewers using an adapted version of a pre-tested data entry form<sup>17</sup>. Any discrepancies will be resolved by discussion among the reviewers.

### **Assessment of Methodological Quality of the Papers**

The quality of the papers included in the review will be assessed independently by two reviewers using an adapted version of a standardised form<sup>17</sup>, which was developed using an approach similar to that of the Cochrane collaboration. The quality assessment form will be designed to capture three broad categories of items which will aim to assess the potential for selection bias and information bias as well as the availability of data on other variables relevant to stage. Each item within these three categories will be allocated a score ranging from 0 (if it did not meet the criteria or if the information provided was unclear) to a maximum of 2 or 4, depending on the item. The overall quality of the study will be expressed as a sum of the item-specific scores. The higher the score the higher the quality of the paper.

### **Data Analysis**

The extracted data will be analysed using the STATA Statistical Software version 13 (StataCorp, Texas). An initial descriptive analysis will be done to provide information about the study population, study design, the

region of Sub-Saharan Africa, stage at presentation and other variables described above in the section on data abstraction. These results will be presented in both narrative and tabular form.

The percentage ( $p_{34}$ ) of breast cancer patients diagnosed at late stages (III and IV) will be the primary outcome of interest in this review. This will be defined as the percentage  $p_{34}=n_{34}/n$  where  $n_{34}$  is the number of women who presented at stages III or IV and  $n$  is the total number of women with known stage information. The suite of *metan* and *metaprop* commands will be used to graphically display population-specific late stage percentages and, if appropriate, to estimate pooled percentages using random effect models. Between-study heterogeneity will be examined using the  $I^2$ -statistics and the  $P$ -value for heterogeneity (Cochrane's  $Q$  statistic) test. Meta-regression analysis will be performed to identify independent sources of heterogeneity (e.g. calendar year, country/region, type of clinical setting). Small study bias will be assessed using funnel plots and the Egger test.

The findings on late stage breast cancer in SSA will be compared with those from African-American and Caucasian populations in the United States (US), for the same time period, using data from the US Surveillance Epidemiology and End Results (SEER) database. The SEER database includes data on all cancer incident cases from nine population-based cancer registries in the US.

## Webappendix-Text 2. PRISMA 2009 Checklist

| Section/topic                      | #  | Checklist item                                                                                                                                                                                                                                                                                              | Reported on page #    |
|------------------------------------|----|-------------------------------------------------------------------------------------------------------------------------------------------------------------------------------------------------------------------------------------------------------------------------------------------------------------|-----------------------|
| <b>TITLE</b>                       |    |                                                                                                                                                                                                                                                                                                             |                       |
| Title                              | 1  | Identify the report as a systematic review, meta-analysis, or both.                                                                                                                                                                                                                                         | 1                     |
| <b>ABSTRACT</b>                    |    |                                                                                                                                                                                                                                                                                                             |                       |
| Structured summary                 | 2  | Provide a structured summary including, as applicable: background; objectives; data sources; study eligibility criteria, participants, and interventions; study appraisal and synthesis methods; results; limitations; conclusions and implications of key findings; systematic review registration number. | 2                     |
| <b>INTRODUCTION</b>                |    |                                                                                                                                                                                                                                                                                                             |                       |
| Rationale                          | 3  | Describe the rationale for the review in the context of what is already known.                                                                                                                                                                                                                              | 3                     |
| Objectives                         | 4  | Provide an explicit statement of questions being addressed with reference to participants, interventions, comparisons, outcomes, and study design (PICOS).                                                                                                                                                  | 5, 6                  |
| <b>METHODS</b>                     |    |                                                                                                                                                                                                                                                                                                             |                       |
| Protocol and registration          | 5  | Indicate if a review protocol exists, if and where it can be accessed (e.g., Web address), and, if available, provide registration information including registration number.                                                                                                                               | 3, Webappendix-Text 1 |
| Eligibility criteria               | 6  | Specify study characteristics (e.g., PICOS, length of follow-up) and report characteristics (e.g., years considered, language, publication status) used as criteria for eligibility, giving rationale.                                                                                                      | 5, 6                  |
| Information sources                | 7  | Describe all information sources (e.g., databases with dates of coverage, contact with study authors to identify additional studies) in the search and date last searched.                                                                                                                                  | 5, 6                  |
| Search                             | 8  | Present full electronic search strategy for at least one database, including any limits used, such that it could be repeated.                                                                                                                                                                               | Webappendix-Text 3    |
| Study selection                    | 9  | State the process for selecting studies (i.e., screening, eligibility, included in systematic review, and, if applicable, included in the meta-analysis).                                                                                                                                                   | 5, 6                  |
| Data collection process            | 10 | Describe method of data extraction from reports (e.g., piloted forms, independently, in duplicate) and any processes for obtaining and confirming data from investigators.                                                                                                                                  | 5, 6                  |
| Data items                         | 11 | List and define all variables for which data were sought (e.g., PICOS, funding sources) and any assumptions and simplifications made.                                                                                                                                                                       | 6                     |
| Risk of bias in individual studies | 12 | Describe methods used for assessing risk of bias of individual studies (including specification of whether this was done at the study or outcome level), and how this information is to be used in any data synthesis.                                                                                      | 7, Webappendix Text 4 |
| Summary measures                   | 13 | State the principal summary measures (e.g., risk ratio, difference in means).                                                                                                                                                                                                                               | 7                     |

| Synthesis of results          | 14 | Describe the methods of handling data and combining results of studies, if done, including measures of consistency (e.g., I <sup>2</sup> ) for each meta-analysis.                                       | 6,7                                               |
|-------------------------------|----|----------------------------------------------------------------------------------------------------------------------------------------------------------------------------------------------------------|---------------------------------------------------|
| Section/topic                 | #  | Checklist item                                                                                                                                                                                           | Reported on page #                                |
| Risk of bias across studies   | 15 | Specify any assessment of risk of bias that may affect the cumulative evidence (e.g., publication bias, selective reporting within studies).                                                             | Page 5, Webappendix Text 4                        |
| Additional analyses           | 16 | Describe methods of additional analyses (e.g., sensitivity or subgroup analyses, meta-regression), if done, indicating which were pre-specified.                                                         | 8                                                 |
| <b>RESULTS</b>                |    |                                                                                                                                                                                                          |                                                   |
| Study selection               | 17 | Give numbers of studies screened, assessed for eligibility, and included in the review, with reasons for exclusions at each stage, ideally with a flow diagram.                                          | Webappendix Figure 1                              |
| Study characteristics         | 18 | For each study, present characteristics for which data were extracted (e.g., study size, PICOS, follow-up period) and provide the citations.                                                             | Webappendix - Table1, References                  |
| Risk of bias within studies   | 19 | Present data on risk of bias of each study and, if available, any outcome level assessment (see item 12).                                                                                                | Supplementary Text 4                              |
| Results of individual studies | 20 | For all outcomes considered (benefits or harms), present, for each study: (a) simple summary data for each intervention group (b) effect estimates and confidence intervals, ideally with a forest plot. | Figures 1b, Figure 2, Webappendix Figures 2 and 3 |
| Synthesis of results          | 21 | Present results of each meta-analysis done, including confidence intervals and measures of consistency.                                                                                                  | Figures 1b, Figure 2, Webappendix Figures 2 and 3 |
| Risk of bias across studies   | 22 | Present results of any assessment of risk of bias across studies (see Item 15).                                                                                                                          | Webappendix-Figure 4                              |
| Additional analysis           | 23 | Give results of additional analyses, if done (e.g., sensitivity or subgroup analyses, meta-regression [see Item 16]).                                                                                    | Table 2                                           |
| <b>DISCUSSION</b>             |    |                                                                                                                                                                                                          |                                                   |
| Summary of evidence           | 24 | Summarize the main findings including the strength of evidence for each main outcome; consider their relevance to key groups (e.g., healthcare providers, users, and policy makers).                     | 11                                                |
| Limitations                   | 25 | Discuss limitations at study and outcome level (e.g., risk of bias), and at review-level (e.g., incomplete retrieval of identified research, reporting bias).                                            | 12, 13                                            |

|                |    |                                                                                                                                            |        |
|----------------|----|--------------------------------------------------------------------------------------------------------------------------------------------|--------|
| Conclusions    | 26 | Provide a general interpretation of the results in the context of other evidence, and implications for future research.                    | 11, 13 |
| <b>FUNDING</b> |    |                                                                                                                                            |        |
| Funding        | 27 | Describe sources of funding for the systematic review and other support (e.g., supply of data); role of funders for the systematic review. | 13     |

## Webappendix-Text 3: Literature Search Strategy

| Database                       | Search Terms                                                                                                                                                                                                                                                                                                                                                                                                                                                                                                                                                                                                                                                                                                                                                                                                                                                                                                                                                                                                                                                                                                                                                                                                                                                                                                                                                                                                                                                                                                                                                                                                                                                                                                                                                                                                                                                                                  |
|--------------------------------|-----------------------------------------------------------------------------------------------------------------------------------------------------------------------------------------------------------------------------------------------------------------------------------------------------------------------------------------------------------------------------------------------------------------------------------------------------------------------------------------------------------------------------------------------------------------------------------------------------------------------------------------------------------------------------------------------------------------------------------------------------------------------------------------------------------------------------------------------------------------------------------------------------------------------------------------------------------------------------------------------------------------------------------------------------------------------------------------------------------------------------------------------------------------------------------------------------------------------------------------------------------------------------------------------------------------------------------------------------------------------------------------------------------------------------------------------------------------------------------------------------------------------------------------------------------------------------------------------------------------------------------------------------------------------------------------------------------------------------------------------------------------------------------------------------------------------------------------------------------------------------------------------|
| <b>Embase</b>                  | <ol style="list-style-type: none"> <li>1. (breast cancer* or breast neoplasm* or breast carcinoma* or breast sarcoma* or breast tumor* or breast tumour* or breast malignanc*).mp. [mp=title, abstract, original title, name of substance word, subject heading word, keyword heading word, protocol supplementary concept, rare disease supplementary concept, unique identifier]</li> <li>2. (Stage or presentation or grade or clinical features or clinical findings).mp. [mp=title, abstract, original title, name of substance word, subject heading word, keyword heading word, protocol supplementary concept, rare disease supplementary concept, unique identifier]</li> <li>3. (Africa or sub-Saharan Africa or Angola or Benin or Botswana or Burkina Faso or Burundi or Cameroun or Cape Verde or Chad or Central African Republic of Comoros or Congo or Cote d'Ivoire or Democratic Republic of Congo or Equatorial Guinea or Eritrea or Ethiopia or Gabon or Gambia or Ghana or Guinea or Guinea-Bissau or Kenya or Lesotho or Liberia or Madagascar or Malawi or Mali or Mozambique or Namibia or Niger or Nigeria or Rwanda or Sao Tome or Senegal or Seychelles or Sierra Leone or Somalia or South Africa or Swaziland or Togo or Uganda or Tanzania or Zambia or Zimbabwe).mp. [mp=title, abstract, original title, name of substance word, subject heading word, keyword heading word, protocol supplementary concept, rare disease supplementary concept, unique identifier]</li> <li>4. 1 and 2 and 3</li> <li>5. exp Breast Neoplasms/</li> <li>6. cancer staging.mp. or exp Neoplasm Staging/</li> <li>7. Africa, Western/ or South Africa/ or Africa, Eastern/ or Africa.mp. or "Africa South of the Sahara"/ or Africa, Central/ or Africa/ or Africa, Southern/</li> <li>8. 1 or 5</li> <li>9. 2 or 6</li> <li>10. 3 or 7</li> <li>11. 8 and 9 and 10</li> </ol> |
| <b>Africa-wide Information</b> | <ol style="list-style-type: none"> <li>1.breast cancer* or breast neoplasm* or breast carcinoma* or breast sarcoma* or breast tumor* or breast tumour* or breast malignanc*</li> <li>2.breast neoplasms</li> <li>3. Stage or presentation or grade or clinical features or clinical findings</li> <li>4.Neoplasm staging</li> <li>5. Africa</li> <li>6. Africa or sub-Saharan Africa or Angola or Benin or Botswana or Burkina Faso or Burundi or Cameroun or Cape Verde or Chad or Central African Republic of Comoros or Congo or Cote d'Ivoire or Democratic Republic of Congo or Equatorial Guinea or Eritrea or Ethiopia or Gabon or Gambia or Ghana or Guinea or Guinea-Bissau or Kenya or Lesotho or Liberia or Madagascar or Malawi or Mali or Mozambique or Namibia or Niger or Nigeria or Rwanda or Sao Tome or Senegal or Seychelles or Sierra Leone or Somalia or South Africa or Swaziland or Togo or Uganda or Tanzania or Zambia or Zimbabwe</li> <li>7.1 or 2</li> <li>8.3 or 4</li> <li>9. 5 or 6</li> <li>10.7 and 8 and 9</li> </ol>                                                                                                                                                                                                                                                                                                                                                                                                                                                                                                                                                                                                                                                                                                                                                                                                                                       |
| <b>Medline</b>                 | <ol style="list-style-type: none"> <li>1.(breast cancer* or breast neoplasm* or breast carcinoma* or breast sarcoma* or breast tumor* or breast tumour* or breast malignanc*).mp. [mp=title, abstract, subject headings,</li> </ol>                                                                                                                                                                                                                                                                                                                                                                                                                                                                                                                                                                                                                                                                                                                                                                                                                                                                                                                                                                                                                                                                                                                                                                                                                                                                                                                                                                                                                                                                                                                                                                                                                                                           |



heading word, drug trade name, original title, device manufacturer, drug manufacturer, device trade name, keyword]

2. (Stage or presentation or grade or clinical features or clinical findings).mp. [mp=title, abstract, subject headings, heading word, drug trade name, original title, device manufacturer, drug manufacturer, device trade name, keyword]

3.(Africa or sub-Saharan Africa or Angola or Benin or Botswana or Burkina Faso or Burundi or Cameroun or Cape Verde or Chad or Central African Republic of Comoros or Congo or Cote d'Ivoire or Democratic Republic of Congo or Equatorial Guinea or Eritrea or Ethiopia or Gabon or Gambia or Ghana or Guinea or Guinea-Bissau or Kenya or Lesotho or Liberia or Madagascar or Malawi or Mali or Mozambique or Namibia or Niger or Nigeria or Rwanda or Sao Tome or Senegal or Seychelles or Sierra Leone or Somalia or South Africa or Swaziland or Togo or Uganda or Tanzania or Zambia or Zimbabwe).mp. [mp=title, abstract, subject headings, heading word, drug trade name, original title, device manufacturer, drug manufacturer, device trade name, keyword]

4.exp breast cancer/

5.1 or 4

6.exp cancer staging/

7.2 or 6

8. "Africa south of the Sahara"/ or South Africa/ or Africa/ or Central Africa/ or Africa.mp.

9. 3 or 8

10. 5 and 7 and 9

**Web of Science**

1. Topic=(breast cancer\* or breast neoplasm\* or breast carcinoma\* or breast sarcoma\* or breast tumor\* or breast tumour\* or breast malignanc\*)

2.Topic=(stage or presentation or grade or clinical features or clinical findings)

3.Topic=(Africa or sub-Saharan Africa or Angola or Benin or Botswana or Burkina Faso or Burundi or Cameroun or Cape Verde or Chad or Central African Republic of Comoros or Congo or Cote d'Ivoire or Democratic Republic of Congo or Equatorial Guinea or Eritrea or Ethiopia or Gabon or Gambia or Ghana or Guinea or Guinea-Bissau or Kenya or Lesotho or Liberia or Madagascar or Malawi or Mali or Mozambique or Namibia or Niger or Nigeria or Rwanda or Sao Tome or Senegal or Seychelles or Sierra Leone or Somalia or South Africa or Swaziland or Togo or Uganda or Tanzania or Zambia or Zimbabwe)

4.1 and 2 and 3

## Webappendix-Text 4: Assessment of Study Quality

The methodological quality of the papers included in the review was evaluated by adapting a standardized quality assessment form previously used by Eng *et al.*<sup>17</sup>. Each paper was scored separately on ten individual parameters within three broad categories aimed at evaluating the potential for biases in the way breast cancer patients were recruited or in the way stage at diagnosis was assessed and reported, as well as the availability of information on stage-related variables. A full list of all items considered is given below.

### Minimizing selection bias

1. Timing of data collection  
Score 0 if unclear  
Score 2 if retrospective  
Score 4 if prospective
2. Study Design  
Score 0 if unclear  
Score 1.5 if opportunistic case series  
Score 2.5 if consecutive case series  
Score 4 if population-based study
3. Percentage of overall study sample size for which information on stage is provided  
Score 0 if unclear  
Score 2 if < 80% of total cases  
Score 4 if  $\geq$  80% of total cases

### Minimizing information bias

4. What staging criteria was used?  
Score 0 if staging criteria was not reported  
Score 4 if TNM or Manchester criteria were used
5. Staging methods  
Score 0 if unclear  
Score 2 if clinical only  
Score 4 if clinical and imaging and other complementary exams
6. How were data on stage at presentation reported?  
Score 0 if unclear  
Score 2 if only data for aggregated categories of early (stages I and II combined) and late stage (stages III and IV combined) were given  
Score 4 if data provided separately for each one of the four stages (I, II, III and IV)

### Assessment of other important variables related to stage at presentation

7. Age at presentation (e.g. mean, median or age-categories)  
Score 0 if not reported  
Score 1 if reported
8. Menopausal status at presentation  
Score 0 if not described  
Score 1 if described
9. Year of Diagnosis  
Score 0 if not reported  
Score 1 if reported
10. Tumor grade  
Score 0 if not reported  
Score 1 if reported

More weight was given to the items in the selection and information bias categories with each one being given a score between 0 and 4, as indicated above.

The category of other variables related to stage at diagnosis included items on the availability of information on age at diagnosis, year at diagnosis, menopausal status at diagnosis and tumour grade. Tumour size was not included in this category because this variable is a component of the TNM staging, and the latter was included as an item in the information bias category. Tumour receptor status was also considered but not included because receptor testing is not routinely carried out in most SSA settings. For each of the four items in this category, a score of 0 was assigned if no information on that variable was provided or a score of 1 if such information was given.

Individual item-specific scores were summed up across the three categories to arrive at a total score for each study. The total score for a study could range from 0 to 28. The lower the score the poorer the methodological quality of the study, i.e. the higher the likelihood it would have been affected by bias. We did not use an arbitrary cut off point to classify studies as being high vs. low quality; instead, we reported the individual scores for each study.

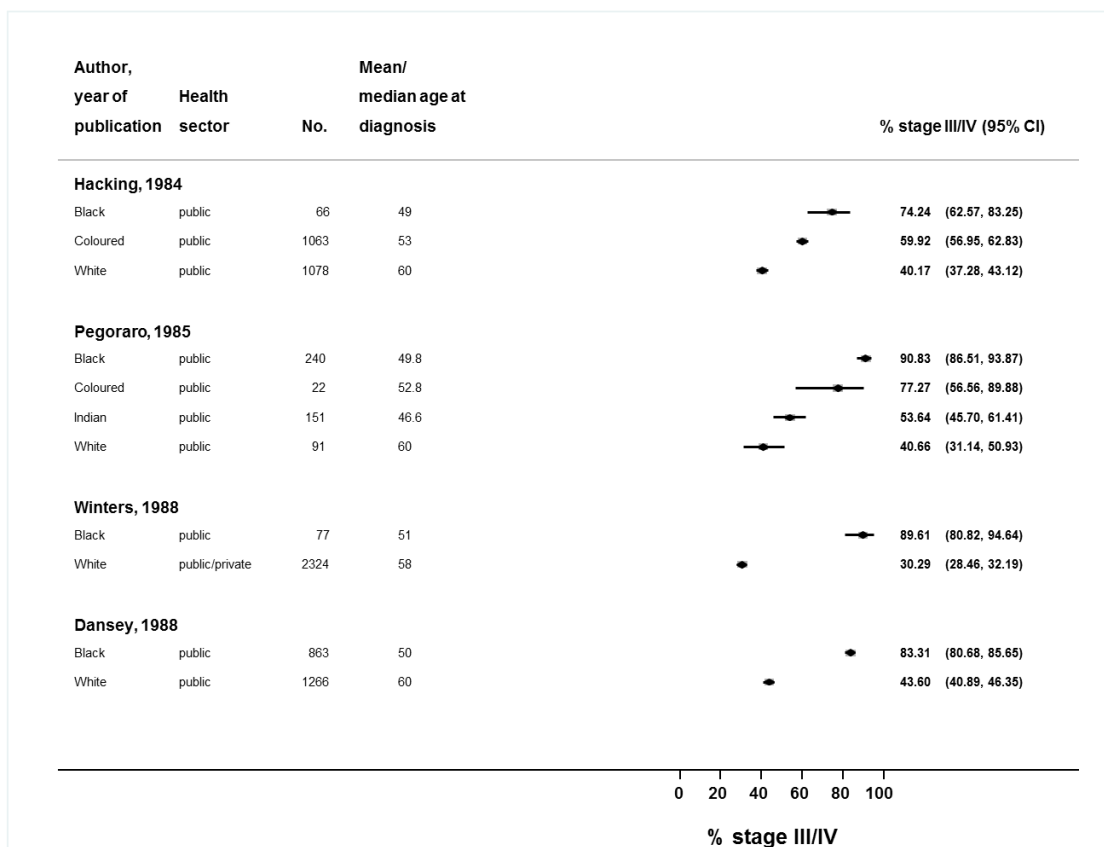

**Webappendix-Figure 1. Study-specific percentage late stage breast cancer at diagnosis in multi-racial South African studies**

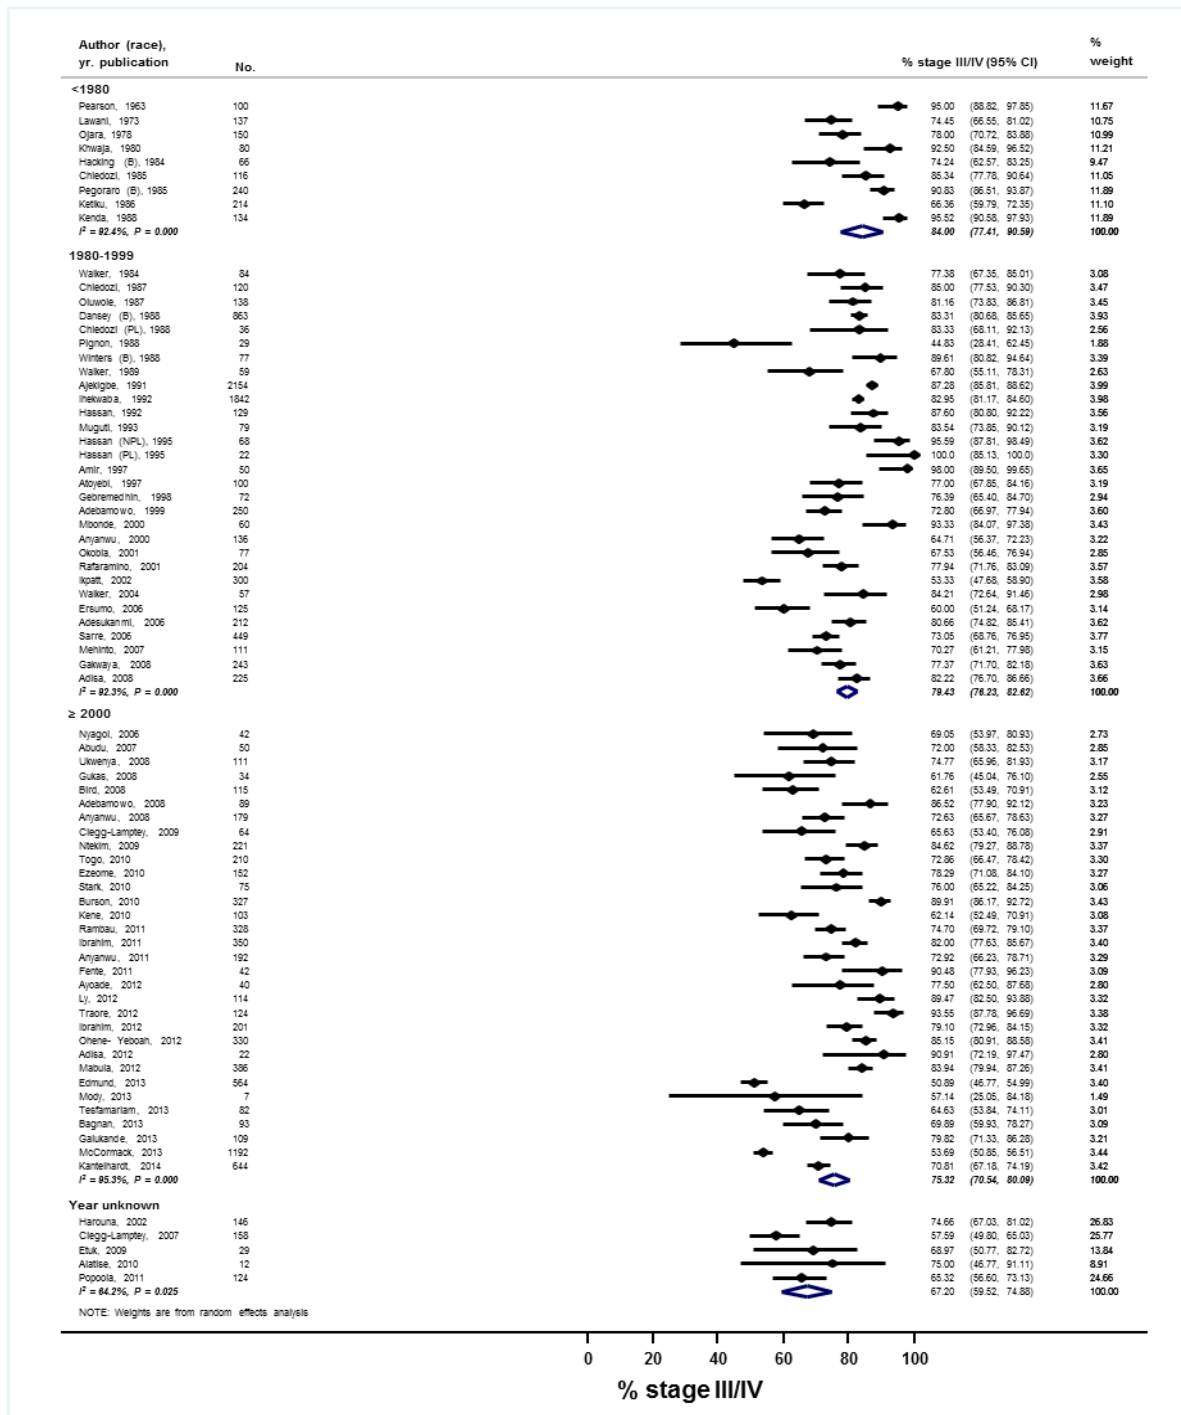

**Webappendix-Figure 2. Study-specific percentage of late stage breast cancer at diagnosis by calendar year at diagnosis**

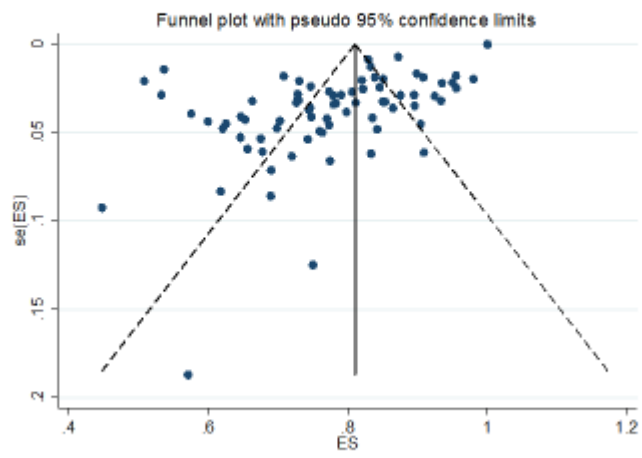

**Webappendix-Figure 3. Funnel plot assessing small study bias**

**Webappendix-Table 1. Characteristics of the study populations included in the systematic review, by SSA region**

| First author, year of publication [ref no.] | Country | Race                                    |                                                | Hospital/clinic, location                                                                                                                                       | Study design | Sample size females (males) | No. of patients with known stage | Staging classification / edition (yr) | Joint TNM distribution given (Y/N) | Criteria used to define late stage                                                                                                                                                                      | Staging methods                                | Percent stage III/IV | Year of diagnosis | Mean/Median age at diagnosis (males where given) | Study quality score |
|---------------------------------------------|---------|-----------------------------------------|------------------------------------------------|-----------------------------------------------------------------------------------------------------------------------------------------------------------------|--------------|-----------------------------|----------------------------------|---------------------------------------|------------------------------------|---------------------------------------------------------------------------------------------------------------------------------------------------------------------------------------------------------|------------------------------------------------|----------------------|-------------------|--------------------------------------------------|---------------------|
|                                             |         | As reported in the original publication | As assigned in the present review <sup>a</sup> |                                                                                                                                                                 |              |                             |                                  |                                       |                                    |                                                                                                                                                                                                         |                                                |                      |                   |                                                  |                     |
| <b>West Africa</b>                          |         |                                         |                                                |                                                                                                                                                                 |              |                             |                                  |                                       |                                    |                                                                                                                                                                                                         |                                                |                      |                   |                                                  |                     |
| Abudu, 2007 <sup>18</sup>                   | Nigeria | NR                                      | Black                                          | Olabisi Onabajo University Teaching Hospital, Shagamu                                                                                                           | OCS          | 50                          | 50                               | Manchester (NK)                       | N                                  | Manchester Stage III and IV                                                                                                                                                                             | NR                                             | 72                   | 2003-2004         | 47.5                                             | 18.5                |
| Adebamowo, 1999 <sup>19</sup>               | Nigeria | Black                                   | Black                                          | University College Hospital, Ibadan                                                                                                                             | CCS          | 250                         | 250                              | Manchester (NK)                       | N                                  | Manchester Stage III and IV                                                                                                                                                                             | NR                                             | 72.8                 | 1992-1995         | 43                                               | 16.5                |
| Adebamowo, 2008 <sup>20</sup>               | Nigeria | NR                                      | Black                                          | University College Hospital, Ibadan                                                                                                                             | CCS          | 192                         | 89                               | TNM (NK)                              | Y                                  | <b>Stage IIIA</b><br>T0 N2 M0<br>T1 N2 M0<br>T2 N2 M0<br>T3 N1 M0<br>T3 N2 M0<br><b>Stage IIIB</b><br>T4 N0 M0<br>T4 N1 M0<br>T4 N2 M0<br>Stage IIIC<br>Any T N3M0<br><b>Stage IV</b><br>Any T Any N M1 | NR                                             | 86.5                 | 2004-2005         | 48.8                                             | 19.5                |
| Adesunkanmi, 2006 <sup>21</sup>             | Nigeria | NR                                      | Black                                          | Obafemi Awolowo University Teaching Hospital, Ife                                                                                                               | CCS          | 211 (+1)                    | 212                              | Manchester (NK)                       | N                                  | Stage III & IV                                                                                                                                                                                          | NR                                             | 80.6                 | 1996-2003         | 48                                               | 22.5                |
| Adisa, 2008 <sup>22</sup>                   | Nigeria | NR                                      | Black                                          | Obafemi Awolowo University Teaching Hospital, Ife                                                                                                               | OCS          | 219 (+6)                    | 225                              | TNM (NK)                              | N                                  | Stages III & IV                                                                                                                                                                                         | NR                                             | 82.2                 | 1993-2002         | 48                                               | 15.5                |
| Adisa, 2012 <sup>23</sup>                   | Nigeria | NR                                      | Black                                          | Abia State University Teaching Hospital, Abia                                                                                                                   | CCS          | 22                          | 22                               | NR                                    | -                                  | Stages III & IV                                                                                                                                                                                         | NR                                             | 90.9                 | 2008-2009         | 47                                               | 20.5                |
| Ajekigbe, 1991 <sup>24</sup>                | Nigeria | NR                                      | Black                                          | Lagos University Teaching Hospital, Lagos                                                                                                                       | CCS          | 2154                        | 2154                             | TNM (NK)                              | N                                  | Stages III & IV                                                                                                                                                                                         | NR                                             | 87.3                 | 1984-1989         | 50.8% <50 yrs                                    | 17.5                |
| Alatise, 2010 <sup>25</sup>                 | Nigeria | NR                                      | Black                                          | Surgery Clinic Obafemi Awolowo University Teaching Hospital, Ife                                                                                                | OCS          | 12                          | 12                               | TNM (NK)                              | Y                                  | Stages III & IV                                                                                                                                                                                         | NR                                             | 75                   | NR                | 50                                               | 17.5                |
| Anyanwu, 2000 <sup>26</sup>                 | Nigeria | NR                                      | Black                                          | University of Nigeria Teaching Hospital, Enugu; Iyi-Enu Hospital, Onitsha; Nnamdi Azikiwe University Teaching Hospital, Nnewi; Ace Specialist Hospital, Onitsha | CCS          | 134 (+2)                    | 136                              | Manchester (2008)                     | N                                  | Stages III & IV                                                                                                                                                                                         | C & I (occasional imaging, likely understaged) | 64                   | 1987-1997         | 44.3                                             | 25.5                |
| Anyanwu, 2008 <sup>27</sup>                 | Nigeria | NR                                      | Black                                          | Nnamdi Azikiwe University Teaching Hospital, Nnewi; Ace Specialist Hospital, Onitsha                                                                            | CCS          | 179                         | 179                              | NR                                    | -                                  | NR                                                                                                                                                                                                      | C & I (Occasional imaging, likely understaged) | 72                   | 1998-2005         | 46.9                                             | 22.5                |
| Anyanwu,                                    | Nigeria | NR                                      | Black                                          | Nnamdi Azikiwe                                                                                                                                                  | CCS          | 273 (+2)                    | 196                              | NR                                    | -                                  | Stages III & IV                                                                                                                                                                                         | C & I                                          | 72                   | 2004-2008         | 45.2                                             | 21.5                |

| First author, year of publication<br><small>[ref no.]</small> | Country | Race                                    |                                                | Hospital/clinic, location                                                                                          | Study design | Sample size females (males) | No. of patients with known stage | Staging classification / edition (yr) | Joint TNM distribution given (Y/N) | Criteria used to define late stage     | Staging methods | Percent stage III/IV | Year of diagnosis | Mean/Median age at diagnosis (males where given) | Study quality score |
|---------------------------------------------------------------|---------|-----------------------------------------|------------------------------------------------|--------------------------------------------------------------------------------------------------------------------|--------------|-----------------------------|----------------------------------|---------------------------------------|------------------------------------|----------------------------------------|-----------------|----------------------|-------------------|--------------------------------------------------|---------------------|
|                                                               |         | As reported in the original publication | As assigned in the present review <sup>a</sup> |                                                                                                                    |              |                             |                                  |                                       |                                    |                                        |                 |                      |                   |                                                  |                     |
| <b>2011</b> <sup>28</sup>                                     |         |                                         |                                                | University Teaching Hospital, Nnewi; & Ace Specialist Hospital, Onitsha                                            |              |                             |                                  |                                       |                                    |                                        |                 |                      |                   |                                                  |                     |
| <b>Atoyebi, 1997</b> <sup>29</sup>                            | Nigeria | NR                                      | Black                                          | Lagos University Teaching Hospital, Lagos                                                                          | CCS          | 99 (+1)                     | 100                              | Manchester (NK)                       | N                                  | Stages III & IV                        | NR              | 77                   | 1992-1995         | 45.8                                             | 19.5                |
| <b>Ayoade, 2012</b> <sup>30</sup>                             | Nigeria | NR                                      | Black                                          | Olabisi Onabanjo University Teaching Hospital, Shagamu                                                             | CCS          | 44                          | 40                               | TNM                                   | Y                                  | Stage III & IV T3N1M0, T4N1Mx & T4N2M1 | NR              | 77.5                 | 2005-2006         | 47                                               | 18.5                |
| <b>Bagnan, 2013</b> <sup>31</sup>                             | Benin   | NR                                      | Black                                          | Hopital de la Mere et de l'enfant-Lagune Cotonou & Clinique Universitaire de gynécologie et d'obstétrique, Cotonou | CCS          | 93                          | 93                               | NR                                    | -                                  | Stages III and IV                      | NR              | 69.9                 | 2000-2008         | 34.2                                             | 15.5                |
| <b>Chiedozi, 1985</b> <sup>32</sup>                           | Nigeria | Black                                   | Black                                          | University of Benin Teaching Hospital, Benin                                                                       | CCS          | 116                         | 116                              | TNM (1985)                            | N                                  | Stages III & IV                        | C               | 85.3                 | 1974-1979         | 42.4                                             | 20.5                |
| <b>Chiedozi, 1987</b> <sup>33</sup>                           | Nigeria | NR                                      | Black                                          | University of Benin Teaching Hospital, Benin                                                                       | CCS          | 120                         | 120                              | TNM (1973)                            | N                                  | Stages III & IV                        | NR              | 85                   | 1978-1983         | 44.8                                             | 22.5                |
| <b>Chiedozi (PL<sup>b</sup>), 1988</b> <sup>34</sup>          | Nigeria | NR                                      | Black                                          | University of Benin Teaching Hospital, Benin                                                                       | CCS          | 36                          | 36                               | TNM (1988)                            | N                                  | Stages III & IV                        | C               | 83.4                 | 1977-1984         | 28.3                                             | 22.5                |
| <b>Clegg-Lamptey, 2007</b> <sup>35</sup>                      | Ghana   | NR                                      | Black                                          | Korle Bu Teaching Hospital, Kumasi                                                                                 | CCS          | 156 (+2)                    | 158                              | TNM (2002)                            | N                                  | Stages III & IV                        | C & I           | 57.6                 | NR                | 48.1                                             | 21.5                |
| <b>Clegg-Lamptey, 2009</b> <sup>36</sup>                      | Ghana   | NR                                      | Black                                          | Korle bu Teaching Hospital, Accra                                                                                  | OCS          | 64                          | 64                               | NR                                    | -                                  | Stages III & IV                        | NR              | 66                   | 2001-2005         | 51                                               | 14.5                |
| <b>Edmund, 2013</b> <sup>37</sup>                             | Ghana   | NR                                      | Black                                          | Dept. Of Pathology, University of Ghana Medical School, Accra                                                      | CCS          | 1342                        | 564                              | TNM (2013)                            | Y                                  | Stages III & IV                        | NR              | 50.9                 | 2005-2009         | 50.3                                             | 16.5                |
| <b>Etuk, 2009</b> <sup>38</sup>                               | Nigeria | NR                                      | Black                                          | Lagos University Teaching Hospital & Lagos State University Teaching Hospital (LASUTH).Lagos                       | OCS          | 29                          | 29                               | NR                                    | -                                  | Stages III & IV                        | NR              | 68.9                 | NR                | 47.2                                             | 16.5                |
| <b>Ezeome, 2010</b> <sup>12</sup>                             | Nigeria | NR                                      | Black                                          | University of Nigeria Teaching Hospital, Enugu                                                                     | CCS          | 162 (+2)                    | 152                              | NR                                    | -                                  | Stages III & IV                        | NR              | 78.3                 | 1999-2005         | 45.7                                             | 20.5                |
| <b>Fente, 2011</b> <sup>39</sup>                              | Nigeria | NR                                      | Black                                          | Niger Delta University Teaching Hospital, Okolobiri                                                                | OCS          | 42                          | 42                               | TNM & Manchester (UICC 1960)          | N                                  | Stage IV (Manchester)                  | NR              | 90.5                 | 2007-2009         | 40                                               | 16.5                |
| <b>Gukas, 2008</b> <sup>40</sup>                              | Nigeria | NR                                      | Black                                          | Jos University Teaching Hospital, Jos                                                                              | OCS          | 34                          | 34                               | TNM (2008)                            | Y                                  | Stages III & IV                        | C               | 61.8                 | 1999-2001         | 45                                               | 21.5                |
| <b>Harouna, 2002</b> <sup>41</sup>                            | Niger   | NR                                      | Black                                          | General Surgery Unit, Issaka Gazoby's Maternity Hospital, Niamey                                                   | CCS          | 146                         | 146                              | TNM (2002)                            | Y                                  | Stages III & IV                        | C & I           | 74.7                 | NR                | 41.1                                             | 22.5                |
| <b>Hassan, 1992</b> <sup>42</sup>                             | Nigeria | NR                                      | Black                                          | Ahmadu Bello University Teaching Hospital, Zaria                                                                   | CCS          | 129                         | 129                              | TNM (1979)                            | Y                                  | Stages III & IV                        | C               | 88                   | 1977-1989         | 38                                               | 21.5                |
| <b>Hassan (PL), 1995</b> <sup>43</sup>                        | Nigeria | NR                                      | Black                                          | Ahmadu Bello Univeristy Teaching Hospital, Shika                                                                   | OCS          | 25                          | 22                               | TNM (1979)                            | N                                  | Stages III & IV                        | NR              | 100                  | 1977-1989         | 34                                               | 19.5                |



| First author, year of publication<br><small>[ref no.]</small> | Country | Race                                    |                                                | Hospital/clinic, location                                                    | Study design | Sample size females (males) | No. of patients with known stage | Staging classification / edition (yr) | Joint TNM distribution given (Y/N) | Criteria used to define late stage                                                                                                        | Staging methods                                                    | Percent stage III/IV | Year of diagnosis | Mean/Median age at diagnosis (males where given) | Study quality score |
|---------------------------------------------------------------|---------|-----------------------------------------|------------------------------------------------|------------------------------------------------------------------------------|--------------|-----------------------------|----------------------------------|---------------------------------------|------------------------------------|-------------------------------------------------------------------------------------------------------------------------------------------|--------------------------------------------------------------------|----------------------|-------------------|--------------------------------------------------|---------------------|
|                                                               |         | As reported in the original publication | As assigned in the present review <sup>a</sup> |                                                                              |              |                             |                                  |                                       |                                    |                                                                                                                                           |                                                                    |                      |                   |                                                  |                     |
| Hassan (NPL), 1995 <sup>43</sup>                              | Nigeria | NR                                      | Black                                          | Ahmadu Bello University Teaching Hospital, Shika                             | OCS          | 70                          | 68                               | TNM (1979)                            | N                                  | Stages III & IV                                                                                                                           | NR                                                                 | 95.5                 | 1977-1989         | 37                                               | 19.5                |
| Ibrahim, 2011 <sup>44</sup>                                   | Nigeria | NR                                      | Black                                          | Lagos State University Teaching Hospital, Lagos                              | CCS          | 344 (+6)                    | 350                              | TNM (2002)                            | Y                                  | Stages III & IV                                                                                                                           | C & I                                                              | 82                   | 2006-2009         | 48.9                                             | 25.5                |
| Ibrahim, 2012 <sup>45</sup>                                   | Nigeria | NR                                      | Black                                          | Lagos State University Teaching Hospital, Lagos                              | CCS          | 201                         | 201                              | NR                                    | -                                  | Stages III & IV                                                                                                                           | C                                                                  | 79.1                 | 2009-2010         | 49.8                                             | 22.5                |
| Ihekwa, 1992 <sup>46</sup>                                    | Nigeria | Black                                   | Black                                          | University College Hospital, Ibadan                                          | CCS          | 1842                        | 1842                             | TNM (1992)                            | Y                                  | Stage III (T2/T3 N2M0) and Stage IV (T2-4N2M1)                                                                                            | C & I                                                              | 82.8                 | 1971-1990         | 48                                               | 18.5                |
| Ikpatt, 2002 <sup>47</sup>                                    | Nigeria | NR                                      | Black                                          | University of Calabar Teaching Hospital, Calabar                             | OCS          | 300                         | 300                              | TNM ( 1997)                           | N                                  | Stages III & IV                                                                                                                           | C & I                                                              | 53.3                 | 1983-1999         | 42.7                                             | 25.5                |
| Kene, 2010 <sup>11</sup>                                      | Nigeria | Black                                   | Black                                          | Ahmadu Bello University Teaching Hospital, Shika (near Zaria)                | OCS          | 99 (+4)                     | 103                              | Manchester                            | N                                  | Stages III & IV                                                                                                                           | NR                                                                 | 62.1                 | 2001-2005         | 44.5                                             | 18.5                |
| Ketiku, 1986 <sup>48</sup>                                    | Nigeria | NR                                      | Black                                          | Lagos State University Teaching Hospital, Lagos                              | OCS          | 214                         | 188                              | NR                                    | -                                  | Stages III & IV                                                                                                                           | C & I                                                              | 66.3                 | 1971-1981         | 45.1                                             | 19.5                |
| Khwaja, 1980 <sup>49</sup>                                    | Nigeria | NR                                      | Black                                          | Ahmadu Bello University Teaching Hospital, Shika                             | CCS          | 73 (+7)                     | 80                               | NR                                    | -                                  | Stages III & IV                                                                                                                           | C                                                                  | 82.5                 | 1972-1977         | 42                                               | 19.5                |
| Lawani, 1973 <sup>50</sup>                                    | Nigeria | NR                                      | Black                                          | University College Hospital, Ibadan                                          | CCS          | 169                         | 137                              | Manchester                            | N                                  | Stages III & IV                                                                                                                           | C                                                                  | 74.5                 | 1961-1968         | 43.5                                             | 24.5                |
| Ly, 2012 <sup>51</sup>                                        | Mali    | NR                                      | Black                                          | Hopital du Point G, Bamako University Hospital, Bamako                       | CCS          | 114                         | 114                              | TNM (NK)                              | N                                  | T3 & T4                                                                                                                                   | C & I                                                              | 90                   | 2008-2011         | 46                                               | 23.5                |
| Mehinto, 2007 <sup>52</sup>                                   | Benin   | NR                                      | Black                                          | Centre National Hospitalier et Universite Hubert K. Maka de Cotonou, Cotonou | OCS          | 111                         | 111                              | TNM (UICC 1987)                       | Y                                  | Stage III<br>T3N1M0<br>T4N1M1<br>T4N2M1<br>Stage IV<br>T4N1M2                                                                             | NR (but metastatic sites listed)                                   | 70.3                 | 1994-2005         | 48.5                                             | 18.5                |
| Ntekim, 2009 <sup>9</sup>                                     | Nigeria | NR                                      | Black                                          | University College Hospital, Ibadan                                          | OCS          | 221                         | 221                              | NR                                    | -                                  | NR                                                                                                                                        | NR                                                                 | 85                   | 2003-2006         | 35.0 <sup>c</sup>                                | 17.5                |
| Ohene-Yeboah, 2012 <sup>53</sup>                              | Ghana   | NR                                      | Black                                          | Komfo Anokye Teaching Hospital, Kumasi                                       | CCS          | 325 (+5)                    | 330                              | TNM (AJCC 2002)                       | Y                                  | Stage IIIA<br>T2N2M0<br>T3N1M0<br>T3N2M0<br>Total<br>Stage IIIB<br>T4N1M0<br>T4N2M0<br>Total<br>Stage IIIC<br>Any TN3Mx<br>Stage VI<br>M1 | C & I (no bone scans done; likely most patients were under-staged) | 85.2                 | 2004-2009         | 49.1                                             | 24.5                |
| Oluwole, 1987 <sup>54</sup>                                   | Nigeria | NR                                      | Black                                          | University of Ife, Ile-Ife                                                   | CCS          | 138 (+1)                    | 138                              | NR                                    | -                                  | Stages III & IV                                                                                                                           | NR                                                                 | 81.2                 | 1977-1986         | 42                                               | 15.5                |
| Okobia, 2001 <sup>4</sup>                                     | Nigeria | NR                                      | Black                                          | University of Benin Teaching Hospital, Benin                                 | OCS          | 75 (+2)                     | 77                               | Manchester                            | N                                  | Stages III & IV                                                                                                                           | C (mostly late stage)                                              | 67.5                 | 1987-1996         | 43.8                                             | 19.5                |
| Pearson, 1963 <sup>5</sup>                                    | Nigeria | NR                                      | Black                                          | University College                                                           | CCS          | 99 (+1)                     | 100                              | Manchester                            | N                                  | Stages III & IV                                                                                                                           | NR                                                                 | 95                   | 1957-1963         | 44.9                                             | 19.5                |

| First author, year of publication<br><small>[ref no.]</small> | Country  | Race                                    |                                                | Hospital/clinic, location                                                                            | Study design | Sample size females (males) | No. of patients with known stage | Staging classification / edition (yr) | Joint TNM distribution given (Y/N) | Criteria used to define late stage                                                                                      | Staging methods                                                         | Percent stage III/IV | Year of diagnosis | Mean/Median age at diagnosis (males where given) | Study quality score |
|---------------------------------------------------------------|----------|-----------------------------------------|------------------------------------------------|------------------------------------------------------------------------------------------------------|--------------|-----------------------------|----------------------------------|---------------------------------------|------------------------------------|-------------------------------------------------------------------------------------------------------------------------|-------------------------------------------------------------------------|----------------------|-------------------|--------------------------------------------------|---------------------|
|                                                               |          | As reported in the original publication | As assigned in the present review <sup>a</sup> |                                                                                                      |              |                             |                                  |                                       |                                    |                                                                                                                         |                                                                         |                      |                   |                                                  |                     |
|                                                               |          |                                         |                                                | Hospital, Ibadan                                                                                     |              |                             |                                  |                                       |                                    |                                                                                                                         |                                                                         |                      |                   |                                                  |                     |
| <b>Popoola, 2011</b> <sup>55</sup>                            | Nigeria  | NR                                      | Black                                          | Lagos State University Teaching Hospital, Lagos                                                      | CCS          | 129                         | 124                              | TNM (NK)                              | N                                  | Stages III & IV                                                                                                         | NR                                                                      | 65.3                 | NR                | 50.5                                             | 19.5                |
| <b>Sarre, 2006</b> <sup>56</sup>                              | Senegal  | NR                                      | Black                                          | Hospital Principal de Dakar, Dakar                                                                   | OCS          | 473                         | 449                              | TNM (NK)                              | Y                                  | T4N1M & T3N1M0                                                                                                          | NR                                                                      | 73.1                 | 1986-2001         | 42.5                                             | 18.5                |
| <b>Stark, 2010</b> <sup>57</sup>                              | Ghana    | NR                                      | Black                                          | Komfe Anokye Teaching Hospital, Kumasi                                                               | OCS          | 75                          | 75                               | NR                                    | -                                  | Stages III & IV                                                                                                         | C                                                                       | 76                   | 2007-2008         | 48                                               | 17.5                |
| <b>Togo, 2010</b> <sup>58</sup>                               | Mali     | NR                                      | Black                                          | Teaching Hospital of Gabriel Toure & Mother and Children Hospital Luxembourg, Bamako                 | OCS          | 205 (+5)                    | 210                              | TNM (NK)                              | Y                                  | NR                                                                                                                      | NR (but metastatic sites listed)                                        | 72.9                 | 1999-2008         | 47.4                                             | 19.5                |
| <b>Traore, 2012</b> <sup>59</sup>                             | Guinea   | NR                                      | Black                                          | Surgical Oncology Unit, Donka University Hospital, Conakry                                           | CCS          | 178 (+6)                    | 124                              | NR                                    | -                                  | Loco-regional involvement & Metastatic                                                                                  | C & I (skeletal x-ray, chest x-ray, US scans)                           | 93.5                 | 2007-2009         | 48                                               | 16.5                |
| <b>Ukwenya, 2008</b> <sup>60</sup>                            | Nigeria  | NR                                      | Black                                          | Ahmadu Bello University Teaching Hospital, Kaduna                                                    | CCS          | 111                         | 111                              | Manchester (NK)                       | N                                  | Stages III & IV                                                                                                         | NR                                                                      | 74.7                 | 2003-2005         | 43.8                                             | 20.5                |
| <b>East Africa</b>                                            |          |                                         |                                                |                                                                                                      |              |                             |                                  |                                       |                                    |                                                                                                                         |                                                                         |                      |                   |                                                  |                     |
| <b>Amir, 1997</b> <sup>61</sup>                               | Tanzania | NR                                      | Black                                          | Muhimbili Medical Centre, Dar Es Salaam                                                              | CCS          | 50                          | 50                               | TNM (NK)                              | Y                                  | <b>Stage IIIA</b><br>T3N0M0,T1N2M0, T3N2M0<br><b>Stage IIIB</b><br>T3N3M0<br>T4N1M0,<br>T4N2M0<br><b>Stage IV</b><br>M1 | C & I (rays, abdominal US, bone scans)                                  | 98                   | 1996-1996         | 90% < 50years                                    | 25.5                |
| <b>Bird, 2008</b> <sup>62</sup>                               | Kenya    | NR                                      | Black                                          | Africa Inland Church Kijabe Hospital, Kijabe                                                         | CCS          | 125 (+4)                    | 115                              | NR                                    | -                                  | NR                                                                                                                      | C & I (No bone scans performed so patients might have been understaged) | 62.6                 | 2001-2007         | 48                                               | 21.5                |
| <b>Burson, 2010</b> <sup>63</sup>                             | Tanzania | NR                                      | Black                                          | Muhimbili National Hospital and Ocean Road Cancer Institute, Dar es Salaam                           | OCS          | 474 (+14)                   | 356                              | TNM (2002)                            | N                                  | Stages III & IV                                                                                                         | NR                                                                      | 90.7                 | 2007-2009         | 43.4                                             | 16.5                |
| <b>Ersumo, 2006</b> <sup>64</sup>                             | Ethiopia | Black                                   | Black                                          | Tikur Anbessa Hospital Addis Ababa                                                                   | OCS          | 112 (+13)                   | 125                              | TNM (1992)                            | N                                  | Stages III & IV                                                                                                         | C & I                                                                   | 60.2                 | 1995-1999         | 42.4                                             | 18.5                |
| <b>Gakwaya, 2008</b> <sup>15</sup>                            | Uganda   | NR                                      | Black                                          | Mulago Hospital, Kampala                                                                             | CCS          | 285 (+12)                   | 243                              | TNM (AJCC, 2002)                      | N                                  | Stages IIIA, IIIB, IIC & IV                                                                                             | NR                                                                      | 77.4                 | 1996-2000         | 47                                               | 18.5                |
| <b>Galukande, 2013</b> <sup>65</sup>                          | Uganda   | NR                                      | Black                                          | Mulago Hospital, Kampala; Makerere University Teaching Hospital; & Ugandan Cancer Institute, Kampala | CCS          | 113                         | 109                              | NR                                    | -                                  | Stages III & IV                                                                                                         | NR                                                                      | 79.8                 | 2011-2012         | 46.7                                             | 20.5                |

| First author, year of publication<br><small>[ref no.]</small> | Country                              | Race                                    |                                                | Hospital/clinic, location                                                                                       | Study design | Sample size females (males) | No. of patients with known stage | Staging classification / edition (yr)    | Joint TNM distribution given (Y/N) | Criteria used to define late stage                           | Staging methods                      | Percent stage III/IV | Year of diagnosis | Mean/Median age at diagnosis (males where given) | Study quality score |
|---------------------------------------------------------------|--------------------------------------|-----------------------------------------|------------------------------------------------|-----------------------------------------------------------------------------------------------------------------|--------------|-----------------------------|----------------------------------|------------------------------------------|------------------------------------|--------------------------------------------------------------|--------------------------------------|----------------------|-------------------|--------------------------------------------------|---------------------|
|                                                               |                                      | As reported in the original publication | As assigned in the present review <sup>a</sup> |                                                                                                                 |              |                             |                                  |                                          |                                    |                                                              |                                      |                      |                   |                                                  |                     |
| <b>Gebremedhin, 1998</b> <sup>7</sup>                         | Ethiopia                             | NR                                      | Black                                          | Tikur Anbessa Hospital, Addis Ababa                                                                             | CCS          | 62 (+10)                    | 72                               | NR                                       | -                                  | Stages III & IV                                              | NR                                   | 76.4                 | 1992-1997         | 41.8 (52.1)                                      | 21.5                |
| <b>Kantelhardt, 2014</b> <sup>66</sup>                        | Ethiopia                             | NR                                      | Black                                          | Addis Ababa University Radiotherapy Center, Addis Ababa                                                         | OCS          | 1070                        | 644                              | TNM (AJCC 7 <sup>th</sup> Edition 2010)  | N                                  | Stage III & IV <sup>d</sup>                                  | C & I (Chest x-ray and abdominal US) | 74.7                 | 2005-2010         | 43                                               | 26                  |
| <b>Kenda, 1988</b> <sup>67</sup>                              | Zaire (Democratic Republic of Congo) | NR                                      | Black                                          | Kinshasa University Hospital, Kinshasa                                                                          | CCS          | 134                         | 134                              | TNM (NK)                                 | N                                  | Stages III & IV                                              | NR                                   | 95.6                 | 1974-1983         | 47                                               | 17.5                |
| <b>Mabula, 2012</b> <sup>3</sup>                              | Tanzania                             | NR                                      | Black                                          | Bugando Medical centre, Mwanza                                                                                  | CCS          | 376 (+8)                    | 384                              | TNM (AJCC 2012)                          | N                                  | Stages III & IV                                              | C & I                                | 84.4                 | 2002-2011         | 45                                               | 18.5                |
| <b>Mbonde, 2000</b> <sup>68</sup>                             | Tanzania                             | NR                                      | Black                                          | Muhimbili Medical Center, Dar Es Salaam                                                                         | OCS          | 60                          | 60                               | TNM (NK)                                 | N                                  | Stages III & IV                                              | NR                                   | 93.3                 | 1995-1997         | 52                                               | 22.5                |
| <b>Mody, 2013</b> <sup>69</sup>                               | Rwanda                               | NR                                      | Black                                          | Butare University Teaching Hospital; Kigali University Teaching Hospital; Kigali & King Faisal Hospital, Kigali | CCS          | 141 (+4)                    | 7                                | TNM (2013)                               | N                                  | NR                                                           | NR                                   | 57                   | 2007-2011         | 48.5                                             | 13.5                |
| <b>Muguti, 1993</b> <sup>70</sup>                             | Zimbabwe                             | Black (B) 100%                          | Black                                          | Mpilo Central Hospital, Bulawayo                                                                                | CCS          | 82 (+2)                     | 79                               | TNM (NK)                                 | N                                  | T3 and T4 tumours                                            | C & I                                | 83.5                 | 1987-1990         | 50                                               | 24.5                |
| <b>Nyagol, 2006</b> <sup>71</sup>                             | Kenya                                | NR                                      | Black                                          | Pathology Department Nairobi Hospital, Nairobi                                                                  | CCS          | 158                         | 42                               | TNM (2006)                               | N                                  | Stages IIIA, IIIB & IV                                       | NR                                   | 69.1                 | 2002-2004         | 47                                               | 20.5                |
| <b>Ojara, 1978</b> <sup>72</sup>                              | Uganda                               | Black                                   | Black                                          | Mulago Hospital, Kampala                                                                                        | CCS          | 152                         | 150                              | M (1978)                                 | N                                  | Stage III & IV                                               | NR                                   | 78                   | 1970-1975         | 35                                               | 21.5                |
| <b>Pignon, 1988</b> <sup>73</sup>                             | Madagascar                           | Black                                   | Black                                          | The island's only cancer hospital, Antananarivo                                                                 | CCS          | 30                          | 29                               | TNM (1988)                               | N                                  | NR                                                           | NR                                   | 44.8                 | 1977-1986         | 30.7 <sup>e</sup>                                | 20.5                |
| <b>Rafaramino, 2001</b> <sup>74</sup>                         | Madagascar                           | Black                                   | Black                                          | The island's only cancer hospital, Antananarivo                                                                 | CCS          | 259                         | 204                              | TNM (1998)                               | N                                  | T3 & T4 tumours                                              | C & I                                | 77.9                 | 1996-1998         | 48.5                                             | 22.5                |
| <b>Rambau, 2011</b> <sup>75</sup>                             | Tanzania                             | NR                                      | Black                                          | Bugando Medical centre, Mwanza                                                                                  | OCS          | 328                         | 328                              | TNM (AJCC 2011)                          | N                                  | Stages III & IV                                              | NR                                   | 74.7                 | 2002-2010         | 47.8                                             | 18.5                |
| <b>Tesfamariam, 2013</b> <sup>76</sup>                        | Eritrea                              | NR                                      | Black                                          | Orotta Medical Surgical National Referral Hospital, Asmara; Halibet Hospital, Asmara & Sembel Hospital, Asmara  | OCS          | 77 (+5)                     | 82                               | TNM (WHO classification of tumours 2003) | N                                  | Stages III & IV                                              | C & I (Imaging in 29% of patients)   | 64                   | 2007-2008         | 48.4                                             | 22.5                |
| <b>Southern Africa</b>                                        |                                      |                                         |                                                |                                                                                                                 |              |                             |                                  |                                          |                                    |                                                              |                                      |                      |                   |                                                  |                     |
| <b>Ariad, 1991</b> <sup>77</sup>                              | South Africa                         | NR                                      | Non-Black                                      | Johannesburg Hospital, Johannesburg                                                                             | OCS          | 58                          | 58                               | NR                                       | -                                  | Stages III & IV                                              | C & I                                | 70.7                 | NR                | 45.5                                             | 20.5                |
| <b>Basro, 2010</b> <sup>8</sup>                               | South Africa                         | NR                                      | Non-Black                                      | Tertiary Hospital and private breast health center in South Africa                                              | OCS          | 141                         | 139                              | TNM (AJCC 2002)                          | N                                  | Stage III (locally advanced) & Stage IV (metastatic disease) | NR                                   | 55.3                 | 2000-2008         | 31 <sup>f</sup>                                  | 19.5                |
| <b>Danse, 1988</b> <sup>78</sup>                              | South                                | White:                                  | Non-Black                                      | Johannesburg and                                                                                                | CCS          | 1351                        | 1267                             | TNM (AJCC)                               | N                                  | <b>Stage 3:</b> T3 and                                       | C & I                                | 43.6                 | 1976-1985         | 60                                               | 22.5                |

| First author, year of publication<br><small>[ref no.]</small> | Country      | Race                                                             |                                                | Hospital/clinic, location                                           | Study design | Sample size females (males) | No. of patients with known stage | Staging classification / edition (yr) | Joint TNM distribution given (Y/N) | Criteria used to define late stage                                             | Staging methods | Percent stage III/IV | Year of diagnosis | Mean/Median age at diagnosis (males where given) | Study quality score |
|---------------------------------------------------------------|--------------|------------------------------------------------------------------|------------------------------------------------|---------------------------------------------------------------------|--------------|-----------------------------|----------------------------------|---------------------------------------|------------------------------------|--------------------------------------------------------------------------------|-----------------|----------------------|-------------------|--------------------------------------------------|---------------------|
|                                                               |              | As reported in the original publication                          | As assigned in the present review <sup>a</sup> |                                                                     |              |                             |                                  |                                       |                                    |                                                                                |                 |                      |                   |                                                  |                     |
|                                                               | Africa       | 60.5%                                                            |                                                | Hilbrow Hospitals, Johannesburg                                     |              |                             |                                  | 1983)                                 |                                    | T4 & any N; any T & N3;<br><b>Stage 4:</b> any T & any N & M1                  |                 |                      |                   |                                                  |                     |
|                                                               |              | Black: 39.5%                                                     | Black                                          | Johannesburg and Hilbrow Hospitals, Johannesburg                    | CCS          | 882                         | 863                              | TNM (AJCC 1983)                       | N                                  | <b>Stage 3:</b> T3 and T4 & N, any T & N3;<br><b>Stage 4:</b> any T any N & M1 | C & I           | 83.3                 | 1976-1985         | 50                                               | 22.5                |
| <b>Du Toit, 1988</b> <sup>79</sup>                            | South Africa | White: 45%<br>Black: 55%                                         | Non-Black                                      | Bloemfontein Academic Hospital, Bloemfontein                        | CCS          | 20                          | 20                               | TNM (AJCC 1988)                       | N                                  | Stages III & IV                                                                | NR              | 40                   | 1971-1982         | 53.6                                             | 17.5                |
| <b>Hacking, 1984</b> <sup>80</sup>                            | South Africa | White: 49%                                                       | Non-Black                                      | Groote Schuur Hospital, Cape Town                                   | OCS          | 1085                        | 1078 <sup>§</sup>                | TNM (1978) & Manchester               | Y                                  | T3-4, N0-3, M0 & T1-4, N0-3, M1                                                | NR              | 40.2                 | 1971-1981         | 60                                               | 17.5                |
|                                                               |              | Coloured: 48%                                                    | Non-Black                                      | Groote Schuur Hospital, Cape Town                                   | OCS          | 1063                        | 1063 <sup>§</sup>                | TNM (1978) & Manchester               | Y                                  | T3-4, N0-3, M0 & T1-4, N0-3, M1                                                | NR              | 59.9                 | 1971-1981         | 53                                               | 17.5                |
|                                                               |              | Black: 3%                                                        | Black                                          | Groote Schuur Hospital, Cape Town                                   | OCS          | 66                          | 66 <sup>§</sup>                  | TNM (1978) & Manchester               | Y                                  | T3-4, N0-3, M0 & T1-4, N0-3, M1                                                | NR              | 74.2                 | 1971-1981         | 49                                               | 17.5                |
| <b>Hoffman, 2000</b> <sup>81</sup>                            | South Africa | Black: 15%;<br>Coloured: 85%                                     | Non-Black                                      | 2 Tertiary Hospitals in Cape Town                                   | PB           | 485                         | 478                              | TNM (1992)                            | N                                  | Stages III & IV (advanced breast cancer)                                       | NR              | 42.2                 | 1994-1997         | 59% < 45 years                                   | 19.5                |
| <b>McCormack, 2013</b> <sup>13</sup>                          | South Africa | Black: 90.3%;<br>White: 4.1%,<br>Coloured: 3.8% &<br>Asian: 1.8% | Black                                          | Chris Hani Baragwanath Academic Hospital (CHBAH) <sup>h</sup>       | CCS          | 1216                        | 1192                             | TNM & Manchester                      | N                                  | Stages III & IV                                                                | C & I           | 54                   | 2006-2012         | 55.3                                             | 25.5                |
| <b>Odendaal, 2003</b> <sup>82</sup>                           | South Africa | NR                                                               | Non-Black                                      | NR                                                                  | OCS          | 236                         | 201                              | TNM (1988)                            | Y                                  | Stage III & T4b<br>N0-1 lesions only                                           | C & I           | 53.2 <sup>i</sup>    | 1990-1996         | 79 <sup>j</sup>                                  | 25.5                |
| <b>Ostyn, 1987</b> <sup>83</sup>                              | South Africa | Mostly Coloured or Indian                                        | Non-Black                                      | Coronation Hospital, Johannesburg                                   | OCS          | 156                         | 120                              | TNM (1979)                            | N                                  | Stages III & IV                                                                | NR              | 51.7                 | 1974-1984         | 52.1                                             | 16.5                |
| <b>Pegoraro, 1980</b> <sup>84</sup>                           | South Africa | Whites: 23%,<br>Indians: 35%<br>Blacks: 42%                      | Non-Black                                      | NR                                                                  | OCS          | 167 (+4)                    | 110                              | TNM (1980)                            | N                                  | T3 & T4                                                                        | NR              | 77.2                 | NR                | 50% were between 45-64 years                     | 14.5                |
| <b>Pegoraro, 1985</b> <sup>85</sup>                           | South Africa | White: 31%                                                       | Non-Black                                      | University of Natal Teaching Hospital & all major hospitals, Durban | OCS          | 197                         | 91                               | TNM (AJCC 1983)                       | N                                  | Stages III & IV                                                                | NR              | 41                   | 1975-1983         | 60                                               | 19.5                |
|                                                               |              | Indian: 26%                                                      | Non-Black                                      | University of Natal Teaching Hospital & all major hospitals, Durban | OCS          | 168                         | 151                              | TNM (AJCC 1983)                       | N                                  | Stages III & IV                                                                | NR              | 54                   | 1975-1983         | 46.6                                             | 19.5                |
|                                                               |              | Coloured: 4%                                                     | Non-Black                                      | University of Natal Teaching Hospital & all major hospitals, Durban | OCS          | 23                          | 22                               | TNM (AJCC 1983)                       | N                                  | Stages III & IV                                                                | NR              | 77                   | 1975-1983         | 52.8                                             | 19.5                |
|                                                               |              | Black: 39%                                                       | Black                                          | University of Natal Teaching Hospital & all major hospitals, Durban | OCS          | 252                         | 240                              | TNM (AJCC 1983)                       | N                                  | Stages III & IV                                                                | NR              | 90                   | 1975-1983         | 49.8                                             | 19.5                |

| First author, year of publication<br><small>[ref no.]</small> | Country      | Race                                    |                                                | Hospital/clinic, location             | Study design | Sample size<br>females<br>(males) | No. of patients with known stage | Staging classification / edition (yr) | Joint TNM distribution given (Y/N) | Criteria used to define late stage | Staging methods | Percent stage III/IV      | Year of diagnosis | Mean/Median age at diagnosis<br>(males where given) | Study quality score |
|---------------------------------------------------------------|--------------|-----------------------------------------|------------------------------------------------|---------------------------------------|--------------|-----------------------------------|----------------------------------|---------------------------------------|------------------------------------|------------------------------------|-----------------|---------------------------|-------------------|-----------------------------------------------------|---------------------|
|                                                               |              | As reported in the original publication | As assigned in the present review <sup>a</sup> |                                       |              |                                   |                                  |                                       |                                    |                                    |                 |                           |                   |                                                     |                     |
| Walker, 1984 <sup>86</sup>                                    | South Africa | Black: 100%                             | Black                                          | Baragwanath Hospital, Johannesburg    | CCS          | 96                                | 84                               | NR                                    | -                                  | NR                                 | NR              | 77.5                      | 1980-1982         | 51.7                                                | 17.5                |
| Walker, 1989 <sup>87</sup>                                    | South Africa | Black 100%                              | Black                                          | Baragwanath Hospital, Johannesburg    | CCS          | 65                                | 59                               | NR                                    | -                                  | Stages III & IV                    | NR              | 67                        | 1986-1987         | 52.5                                                |                     |
| Walker, 2004 <sup>88</sup>                                    | South Africa | Black: 100%                             | Black                                          | King Edward the VIII Hospital, Durban | CCS          | 57                                | 57                               | NR                                    | -                                  | Stages III & IV                    | NR              | 84.2                      | 1999-1999         | 54.1                                                | 12.5                |
| Wasserman, 2007 <sup>89</sup>                                 | South Africa | NR                                      | Non-Black                                      | Tygerberg Hospital, Tygerberg         | OCS          | 483                               | 421 <sup>j</sup>                 | TNM (6th edition)                     | Y                                  | Stages III & IV                    | NR              | (14)<br>54.8 <sup>k</sup> | 1990-2004         | 77.3 <sup>l</sup>                                   | 20.5                |
| Winters, 1988 <sup>6</sup>                                    | South Africa | White: 96%                              | Non-Black                                      | NR <sup>m</sup>                       | OCS          | 2346                              | 2324                             | NR                                    | -                                  | NR                                 | NR              | 30                        | NR                | 58                                                  | 19.5                |
|                                                               |              | Black: 4%                               | Black                                          | Baragwanath Hospital, Johannesburg    | OCS          | 94                                | 77                               | NR                                    | -                                  | NR                                 | NR              | 90                        | 1980-1986         | 51                                                  | 20.5                |

C: Clinical methods; CCS: Consecutive case series; I: Imaging methods; M: Manchester staging classification; NPL: Non-pregnant/non-lactating women; NR: Not reported in the original publication; OCS: Opportunistic (convenience) case series; PBS: Population-based study; PL: Pregnant/lactating women; TNM: Tumour Node Metastases.

<sup>a</sup> As defined in Table 1.

<sup>b</sup> This study included a group of PL and a group of NPL, but the latter was not included in the review because NPL women were matched the PL women on stage at diagnosis.

<sup>c</sup> This study included women aged  $\leq 40$  years only.

<sup>d</sup> Information in supplementary material used to calculate number in Stage IV.

<sup>e</sup> This study included women aged  $\leq 35$  years only.

<sup>f</sup> This study included women aged  $\leq 35$  years only.

<sup>g</sup> Numbers of women by stage and race were not given; hence, approximate numbers were inferred from the data shown in table 1 and figure 1 of the original publication.

<sup>h</sup> Chris Hani Baragwanath Academic Hospital Johannesburg was previously the Baragwanath Hospital Johannesburg.

<sup>i</sup> The authors included stages I to III and early stage IV cancers in their study but provided stage information on the patients excluded and we included these in the calculation of % late stage in our review.

<sup>j</sup> This was a study of elderly breast cancer patients aged  $\geq 70$  years with T1-T3 and small localised T4N0-1 tumours.

<sup>k</sup> The authors gave stage distribution for the included patients (n=188) with % stage III as 14% in table 5 of the paper, however, the stage of distribution of excluded patients (n=233) was also given in the text, so a total of 421 patients were used to derive % III/IV (54.8%).

<sup>l</sup> This study included women aged  $\geq 70$  years only.

<sup>m</sup> The authors stated that their series of Black patients was compared with a similar unpublished study of White women but did not provide details on how the latter were recruited.

**Webappendix-Table 2. Late stage (III/IV) breast cancer at diagnosis, self-reported duration of symptoms, and tumour characteristics (size, grade, ER positivity and histology), by study population in SSA <sup>a, b</sup>**

| First author, year (race) <sup>c</sup> | % Late stage (III/IV) at diagnosis | Mean/median duration of symptoms (months) | Mean/median tumour size (cm) | % ER-positive tumours | % grade 3 tumours | Histology (% ductal NST) |
|----------------------------------------|------------------------------------|-------------------------------------------|------------------------------|-----------------------|-------------------|--------------------------|
| <b>West Africa</b>                     |                                    |                                           |                              |                       |                   |                          |
| Abudu, 2007 (B)                        | 72                                 | -                                         | -                            | -                     | 62                | 92                       |
| Adebamowo, 2008 (B)                    | 86.5                               | -                                         | -                            | 65.1                  | 15.6              | 82.3                     |
| Adesunkanmi, 2006 (B)                  | 80.6                               | 11.2                                      | -                            | -                     | -                 | 90                       |
| Adisa, 2012 (B)                        | 90.9                               | -                                         | -                            | 24                    | 100               | 53 <sup>d</sup>          |
| Alatise, 2010 (B)                      | 75.0                               | -                                         | 8.5                          | -                     | 91.7              | 100                      |
| Anyanwu, 2000 (B)                      | 64.0                               | 4.5                                       | -                            | -                     | -                 | 73                       |
| Anyanwu, 2008 (B)                      | 72.0                               | 3.5                                       | -                            | -                     | -                 | 80                       |
| Anyanwu, 2011 (B)                      | 72.0                               | 52% >6 months                             | -                            | -                     | -                 | 85.5                     |
| Atoyebi, 1997 (B)                      | 77.0                               | 13.3                                      | -                            | -                     | -                 | 94                       |
| Ayoade, 2012 (B)                       | 77.5                               | 6.7                                       | -                            | -                     | -                 | -                        |
| Bagnan, 2013 (B)                       | 69.9                               | -                                         | -                            | -                     | -                 | 33.3 <sup>e</sup>        |
| Chiedozi, 1985 (B)                     | 85.3                               | -                                         | -                            | -                     | 50                | 19 <sup>f</sup>          |
| Chiedozi, 1987 (B)                     | 85.0                               | -                                         | -                            | -                     | 50                | -                        |
| Chiedozi, 1988 (B, PL)                 | 83.4                               | 6                                         | -                            | -                     | 55.6              | -                        |
| Clegg-Lampsey, 2007 (B)                | 57.6                               | 10                                        | 7                            | -                     | -                 | 85.8                     |
| Edmund, 2013 (B)                       | 50.9                               | 7.5                                       | 4.5                          | -                     | 28.9              | 91.6                     |
| Ezeome, 2010 (B)                       | 78.3                               | 2                                         | -                            | -                     | -                 | -                        |
| Fente, 2011 (B)                        | 90.5                               | -                                         | -                            | -                     | -                 | 54.7 <sup>g</sup>        |
| Gukas, 2008 (B)                        | 61.8                               | -                                         | -                            | 26.5                  | 70.6              | 97                       |
| Harouna, 2002 (B)                      | 74.7                               | 8.8                                       | -                            | -                     | -                 | -                        |
| Hassan, 1992 (B)                       | 88.0                               | 9.3                                       | 10                           | -                     | -                 | 85                       |
| Hassan, 1995 (B, PL)                   | 100                                | 10                                        | 8                            | -                     | -                 | 72                       |
| Hassan, 1995 (B, NPL)                  | 95.5                               | 9                                         | 8                            | -                     | -                 | 70.5                     |
| Ibrahim, 2011 (B)                      | 82.0                               | 10.8                                      | -                            | -                     | -                 | 93                       |
| Ibrahim, 2012 (B)                      | 79.1                               | 12.1                                      | -                            | -                     | -                 | -                        |
| Ihekweba, 1992 (B)                     | 82.8                               | 10.9                                      | 6.5                          | -                     | -                 | 49.2 <sup>h</sup>        |
| Ikpatt, 2002 (B)                       | 53.3                               | -                                         | 4.8                          | -                     | 45.7              | 84                       |
| Kene, 2010 (B)                         | 62.1                               | -                                         | -                            | -                     | -                 | 82.5                     |
| Ketiku, 1986 (B)                       | 66.3                               | -                                         | -                            | -                     | -                 | 33.6 <sup>i</sup>        |
| Khwaja, 1980 (B)                       | 92.5                               | 11                                        | -                            | -                     | 90.9              | 82.5                     |
| Lawani, 1973 (B)                       | 74.5                               | 9                                         | -                            | -                     | 31                | 53.8 <sup>j</sup>        |
| Ly, 2012 (B)                           | 90.0                               | -                                         | 90% >5                       | 39                    | 78                | 94                       |
| Mehinto, 2007 (B)                      | 70.3 <sup>k</sup>                  | -                                         | -                            | -                     | 38.9              | 86.4                     |
| Ntekim, 2009 (B)                       | 85                                 | -                                         | -                            | -                     | -                 | 95                       |
| Ohene-Yeboah, 2012 (B)                 | 85.2                               | 13.8                                      | -                            | 47.1                  | 53.7              | 82.1                     |
| Okobia, 2001 (B)                       | 67.5                               | 9                                         | -                            | -                     | -                 | 66.8                     |
| Oluwole, 1987 (B)                      | 81.2                               | -                                         | -                            | -                     | -                 | 30.2 <sup>l</sup>        |
| Pearson, 1963 (B)                      | 95.0                               | 6                                         | 9.7                          | -                     | 80                | -                        |
| Sarre, 2006 (B)                        | 73.1                               | 9                                         | -                            | -                     | 45.6              | 89.9                     |
| Stark, 2010 (B)                        | 76.0                               | -                                         | 3.2                          | 24                    | 76                | 66.7                     |
| Togo, 2010 (B)                         | 72.9                               | 17.8                                      | -                            | 58.1                  | -                 | 57.4 <sup>m</sup>        |
| Traore, 2012 (B)                       | 93.5                               | -                                         | -                            | 30.7                  | -                 | 73.8                     |
| Ukwenya, 2008 (B)                      | 74.7                               | 9                                         | -                            | -                     | -                 | -                        |
| <b>East Africa</b>                     |                                    |                                           |                              |                       |                   |                          |
| Amir, 1997 (B)                         | 98                                 | -                                         | -                            | -                     | -                 | 100                      |
| Bird, 2008 (B)                         | 62.6                               | 12                                        | 6.8                          | 24                    | 50                | 90                       |
| Burson, 2010 (B)                       | 90.7                               | 17.2                                      | 69.1% $\geq 5$               | 50.8                  | -                 | 85.5                     |
| Ersumo, 2006 (B)                       | 60.2                               | 11.5                                      | 60% >5                       | -                     | -                 | 77.6                     |
| Gakwaya, 2008 (B)                      | 77.4                               | -                                         | -                            | -                     | 58                | 76                       |
| Galukande, 2013 (B)                    | 79.8                               | -                                         | -                            | 47                    | 65.2              | 93.8                     |
| Gebremedhin, 1998 (B)                  | 76.4                               | 12                                        | 6.5                          | -                     | -                 | 85.2                     |

|                       |      |      |     |      |      |                   |
|-----------------------|------|------|-----|------|------|-------------------|
| Kantelhardt, 2014 (B) | 71   | -    | 5   | -    | 24.8 | 79.2              |
| Kenda, 1988 (B)       | 95.6 | -    | -   | -    | 26.5 | 68.9              |
| Mabula, 2012 (B)      | 84.4 | 11.4 | 6   | -    | 63.8 | 91.7              |
| Mbonde, 2000 (B)      | 93.3 | 11   | 8   | 33.3 | 46.6 | 78.3              |
| Mody, 2013 (B)        | 57   | 11.2 | -   | -    | -    | -                 |
| Muguti, 1993 (B)      | 83.5 | 7    | 8   | -    | -    | -                 |
| Nyagol, 2006 (B)      | 69.1 | -    | 4.5 | 37.3 | 66   | 92.4              |
| Pignon, 1988 (B)      | 44.8 | 14.1 | -   | -    | 60   | 0 <sup>n</sup>    |
| Rafaramino, 2001 (B)  | 77.9 | 9.4  | -   | -    | 56.5 | 55.6 <sup>o</sup> |
| Rambau 2011 (B)       | 74.7 | -    | 5.5 | -    | 56.4 | 91.5              |
| Tesfamariam, 2013 (B) | 64   | 34.8 | -   | -    | -    | 82                |

### South Africa

|                        |      |   |              |      |      |                 |
|------------------------|------|---|--------------|------|------|-----------------|
| Ariad, 1991 (NB)       | 70.7 | - | -            | 40.7 | -    | 84.5            |
| Basro, 2010 (NB)       | 55.3 | - | 79% $\geq 2$ | 67.8 | 46.7 | 92.9            |
| Du Toit, 1988 (NB)     | 40   | - | -            | -    | -    | 85 <sup>p</sup> |
| McCormack, 2013 (B)    | 54   | - | -            | 64.9 | 42.3 | 80              |
| Odendaal, 2003 (NB)    | 53.2 | - | 4            | -    | 11.2 | 73              |
| Ostyn, 1987 (NB)       | 51.7 | - | -            | -    | -    | 67              |
| Pegoraro, 1980 (NB)    | 77.2 | - | 7.5          | 52.7 | -    | -               |
| Pegoraro, 1985 (B)     | 90   | - | 7.5          | -    | 71   | -               |
| Pegoraro, 1985 (NB, I) | 54   | - | 5            | -    | 72   | -               |
| Pegoraro, 1985 (NB, W) | 41   | - | 3.5          | -    | 47   | -               |
| Winters, 1988 (B)      | 90   | - | -            | 55   | 27   | 90              |
| Winters, 1988 (NB, W)  | 30   | - | -            | 65   | -    | -               |

### No. of study populations with available information<sup>a</sup>

|                                    |                 |    |    |    |    |    |
|------------------------------------|-----------------|----|----|----|----|----|
| <b>All (Black &amp; non-Black)</b> | 73 <sup>b</sup> | 36 | 27 | 19 | 36 | 58 |
| <b>Black only</b>                  | 64              | 36 | 22 | 15 | 32 | 53 |

- Information not provided in the original publication; B: Black women; I: Indian women; NST: invasive intra-ductal carcinoma; NB: Non-Black women; NPL: Non-pregnant and non-lactating women; PL: Non-pregnant and non-lactating women; SSA: sub-Saharan Africa; W: White women

<sup>a</sup> Some studies have more than one study population (i.e. PL and NPL women; multiple racial groups) – see Table 1 (footnote a).

<sup>b</sup> Restricted to study populations with information on stage at presentation and at least one of the other variables shown in this Table.

<sup>c</sup> Reference numbers as in webappendix-Table 1. Race as defined in Table 1 (footnote b) and webappendix-Table 1.

<sup>d</sup> The authors reported that 53% of the tumours were invasive ductal carcinoma, not otherwise specified (NST), 18% invasive lobular carcinoma (ILC), 18% a mix of NST and ILC, and 12% other subtypes.

<sup>e</sup> Other histological subtypes not reported.

<sup>f</sup> Other histological subtypes included anaplastic carcinoma (50%), scirrhous carcinoma (28.4%), Paget's disease (1.7%), and mucoid carcinoma (0.9%).

<sup>g</sup> Other histological subtypes comprised undifferentiated (19.1%), lobular carcinoma (12%), papillary (7.4%), others (6.9%).

<sup>h</sup> Other histological types included infiltrating anaplastic carcinoma (33.3%), medullary carcinoma (5.9%), lobular carcinoma (2.8%), papillary carcinoma (2.3%), mucinous carcinoma (1.5%), others (5%).

<sup>i</sup> Other histological subtypes comprised anaplastic carcinoma (22.9%), scirrhous carcinoma (8.9%), adenocarcinoma (7.5%), medullary carcinoma (4.2%), mixed carcinoma (3.7%), colloid carcinoma (2.8%), comedo carcinoma (2.8%) and other subtypes (13.6%).

<sup>j</sup> The most common subtypes reported were adenocarcinoma 33.7%, and other subtypes 12.5%

<sup>k</sup> The authors used the UICC 1987 TNM classification (33<sup>rd</sup> Edition). Stage reclassified using the AJCC TNM classification 7<sup>th</sup> Edition

<sup>l</sup> Other histological subtypes were poorly differentiated adenocarcinoma (33.8%), anaplastic carcinoma (9.4%), inflammatory carcinoma (7.9%), and others (18.7%).

<sup>m</sup> Other histological subtypes comprised infiltrating lobular carcinoma (21.4%), medullary carcinoma (3.3%), and others (17.9%)

<sup>n</sup> Most common subtypes were adenocarcinoma not otherwise specified (31.3%), intraductal carcinoma (6.3%), atypical carcinoma (28.1%), and others (34.4%).

<sup>o</sup> Other histological subtypes included adenocarcinoma (31.7%), mucinous carcinoma (3.5%), infiltrating lobular carcinoma (2.3%), and others (6.9%).

<sup>p</sup> All patients in this study had Paget's disease of the breast; histologically, they were all ductal carcinomas but three were intra-ductal.

## Webappendix-References

1. International Agency for Research on Cancer GLOBOCAN 2012 <http://globocan.iarc.fr/Default.aspx> [Accessed 13 August 2015].
2. Ferlay J, Soerjomataram I, Dikshit R, et al. Cancer incidence and mortality worldwide: sources, methods and major patterns in GLOBOCAN 2012. *Int J Cancer* 2015;**136**:E359-86.
3. Mabula JB, McHembe MD, Chalya PL, et al. Stage at diagnosis, clinicopathological and treatment patterns of breast cancer at Bugando Medical Centre in north-western Tanzania. *Tanz J Health Res* 2012;**14**:269-79.
4. Okobia MN, Osime U. Clinicopathological study of carcinoma of the breast in Benin City. *Afr J Reprod Health* 2001;**5**:56-62.
5. Pearson JB. Carcinoma of the breast in Nigeria. A review of 100 patients. *Br J Cancer* 1963;**17**:559-565.
6. Winters Z, Mannell A, Esser JD. Breast cancer in black South Africans. *S Afr J Surg* 1988;**26**:69-70.
7. Gebremedhin A, Shamebo M. Clinical profile of Ethiopian patients with breast cancer. *East Afr Med J* 1998;**75**:640-643.
8. Basro S, Apffelstaedt JP. Breast cancer in young women in a limited-resource environment. *World J Surg* 2010;**34**:1427-1433.
9. Ntekim A, Nufu FT, Campbell OB. Breast cancer in young women in Ibadan, Nigeria. *Afr Health Sci* 2009;**9**:242-246.
10. Anyanwu SN. Survival following treatment of primary breast cancer in eastern Nigeria. *East Afr Med J* 2000;**77**:539-543.
11. Kene TS, Odigie VI, Yusufu LM, Yusuf BO, Shehu SM, Kase JT. Pattern of presentation and survival of breast cancer in a teaching hospital in north Western Nigeria. *Oman Med J* 2010;**25**:104-7.
12. Ezeome ER. Delays in presentation and treatment of breast cancer in Enugu, Nigeria. *Niger J Clin Pract* 2010;**13**:311-316.
13. McCormack VA, Joffe M, van den Berg E, et al. Breast cancer receptor status and stage at diagnosis in over 1,200 consecutive public hospital patients in Soweto, South Africa: a case series. *Breast Cancer Res* 2013;**15**:R84.
14. Galukande M, Wabinga H, Mirembe F. Breast cancer survival experiences at a tertiary hospital in sub-Saharan Africa: a cohort study. *World J Surg Oncol* 2015;**13**:220.
15. Gakwaya A, Kigula-Mugambe JB, Kavuma A, et al. Cancer of the breast: 5-Year survival in a tertiary hospital in Uganda. *Br J Cancer* 2008;**99**:63-67.
16. United Nations Methods and Classification: Composition of macro geographical (continental) regions, geographical sub-regions, and selected economic and other groupings <http://unstats.un.org/unsd/methods/m49/m49regin.htm> [accessed April 11th, 2016].
17. Eng A, McCormack V, dos-Santos-Silva I. Receptor-defined subtypes of breast cancer in indigenous populations in Africa: a systematic review and meta-analysis. *PLoS Med* 2014;**11**(9):e1001720.
18. Abudu EK, Banjo AAF, Izegbu MC, Agboola AOJ, Anunobi CC, Musa OA. Malignant breast lesions at Olabisi Onabanjo University Teaching Hospital (O.O.U.T.H), Sagamu: a histopathological review. *Niger Postgrad Med J* 2007;**14**:57-9.
19. Adebamowo CA, Adekunle OO. Case-controlled study of the epidemiological risk factors for breast cancer in Nigeria. *Br J Surg* 1999;**86**(5):665-8.
20. Adebamowo CA, Famooto A, Ogundiran TO, Aniagwu T, Nkwodimmah C, Akang EE. Immunohistochemical and molecular subtypes of breast cancer in Nigeria. *Breast Cancer Res Treat* 2008;**110**:183-8.
21. Adesunikanmi ARK, Lawal OO, Adelusola KA, Durosimi MA. The severity, outcome and challenges of breast cancer in Nigeria. *Breast* 2006;**15**:399-409.
22. Adisa AO, Lawal OO, Adesunikanmi ARK. Evaluation of patients' adherence to chemotherapy for breast cancer. *Afr J Health Sci* 2008;**15**:22-27.
23. Adisa CA, Eleweke N, Alfred Au A, et al. Biology of breast cancer in Nigerian women: A pilot study. *Ann Afr Med* 2012;**11**:169-175.
24. Ajekigbe AT. Fear of mastectomy: the most common factor responsible for late presentation of carcinoma of the breast in Nigeria. *Clin Oncol (Royal College of Radiologists (Great Britain))* 1991;**3**:78-80.
25. Alatisse OI, Schrauzer GN. Lead exposure: a contributing cause of the current breast cancer epidemic in Nigerian women. *Biol Trace Elem Res* 2010;**136**:127-39.
26. Anyanwu SN. Breast cancer in eastern Nigeria: a ten year review. *West Afr J Med* 2000;**19**:120-125.
27. Anyanwu SN. Temporal trends in breast cancer presentation in the third world. *J Exp Clin Cancer Res: CR* 2008;**27**:17.
28. Anyanwu SNC, Egwuonwu OA, Ihekwoaba EC. Acceptance and adherence to treatment among breast cancer patients in Eastern Nigeria. *Breast* 2011;**20**:S51-S53.



29. Atoyebi OA AC, Adesanya AA, Beredugo BK, da Rocha-Afodu. An appraisal of 100 patients with Breast Cancer seen at the Lagos University Teaching Hospital. *Nig Q J Hosp Med* 1997;**7**:104-108.
30. Ayoade BA, Tade AO, Salami BA. Clinical features and pattern of presentation of breast diseases in surgical outpatient clinic of a suburban tertiary hospital in South-west Nigeria. *Niger J Surg* 2012;**18**(1):13-6.
31. Bagnan JAT, Denakpo JL, Aguida B, et al. Epidemiology of the gynecological and mammary cancer to the HOMEL and in the CUGO Cotonou, Benin. [French]. *Bull Cancer* 2013;**100**:141-146.
32. Chiedozi LC. Breast-cancer in Nigeria. *Cancer* 1985;**55**:653-657.
33. Chiedozi LC. Rapidly progressing breast cancer in Nigeria. *Eur J Surg Oncol* 1987;**13**:505-509.
34. Chiedozi LC, Iweze FI, Aboh IF, Ajobor LN. Breast cancer in pregnancy and lactation. *Trop Geogr Med* 1988;**40**:26-30.
35. Clegg-Lampsey J, Hodasi W. A study of breast cancer in korle bu teaching hospital: assessing the impact of health education. *Ghana Med J* 2007;**41**:72-7.
36. Clegg-Lampsey J, Dakubo J, Attobra YN. Why do breast cancer patients report late or abscond during treatment in ghana? A pilot study. *Ghana Med J* 2009;**43**:127-31.
37. Edmund DM, Naaeder SB, Tettey Y, Gyasi RK. Breast cancer in ghanaian women: what has changed? *Am J Clin Pathol* 2013;**140**:97-102.
38. Etuk AI, Charles-Davies MA, Arinola OG. Oestrogen levels and humoral immune parameters in Nigerian breast cancer patients. *Tanzan Med J* 2009;**24**:1-4.
39. Fente BG, Alagoa PJ. Three-year clinico-pathological observations of breast carcinoma in Okolobiri, Bayelsa State, Nigeria. *Port Harcourt Med J* 2012;**6**:59-64.
40. Gukas ID, Girling AC, Mandong BM, Prime W, Jennings BA, Leinster SJ. A comparison of clinicopathological features and molecular markers in british and nigerian women with breast cancer. *Clin Med: Oncol* 2008;**2**:347-51.
41. Harouna YDB, I.; Kanou, H.M.; Epiphane, M.W.; Garba, M.; Nayama, M.; Nafiou, M. Le cancer du sein de la femme au Niger. Epidemiologie et clinique a propos de 146 cas. *Med Afr Noire* 2002;**1**:39-43.
42. Hassan I, Onukak EE, Mabogunje OA. Breast cancer in Zaria, Nigeria. *J R Coll Surg Edinb* 1992;**37**:159-161.
43. Hassan I, Muhammed I, Attah MM, Mabogunje O. Breast cancer during pregnancy and lactation in Zaria, Nigeria. *East Afr Med J* 1995;**72**:280-282.
44. Ibrahim NA, Popoola AO, Oludara MA, Omodele FO, Fadeyibi IO. Breast cancer among urban Nigerian women: Appraising presentation and the quality of care. *Maced J Med Sci* 2011;**4**:388-392.
45. Ibrahim NA, Oludara MA. Socio-demographic factors and reasons associated with delay in breast cancer presentation: A study in Nigerian women. *Breast* 2012;**21**:416-418.
46. Ihekwa FN. Breast cancer in Nigerian women. *Br J Surg* 1992;**79**:771-5.
47. Ikpat O, Ndoma-Egba R, Collan Y. Prognostic value of necrosis in Nigerian breast cancer. *Adv Clin Path* 2002;**6**:31-37.
48. Ketiku KK. The pattern of metastases in Nigerian breast cancer patients. *Clin Radiol* 1986;**37**:563-5.
49. Khwaja MS, Nirodi NS, Lawrie JH. Malignant tumours of the breast in northern savannah of Nigeria. *East Afr Med J* 1980;**57**:555-561.
50. Lawani J NV, Osunkoya BO. A clinico-pathological review of malignant disease of the breast in the University College Hospital, Ibadan. *Niger Med J* 1973;**3**:182-187.
51. Ly M, Antoine M, Dembele AK, et al. High incidence of triple-negative tumors in sub-saharan Africa: a prospective study of breast cancer characteristics and risk factors in Malian women seen in a Bamako university hospital. *Oncol* 2012;**83**:257-63.
52. Mehinto DK, Medji ST, Hougbe F, Padonou N. Traitement du cancer du sein chez la femme. *Med Afr Noire* 2007;**54**:277-285.
53. Ohene-Yeboah M, Adjei E. Breast cancer in Kumasi, Ghana. *Ghana Med J* 2012;**46**:8-13.
54. Oluwole SF, Fadiran OA, Odesanmi WO. Diseases of the Breast in Nigeria. *Br J Surg* 1987;**74**:582-585.
55. Popoola AO, Adewuya AO. Prevalence and correlates of depressive disorders in outpatients with breast cancer in Lagos, Nigeria. *Psychooncology* 2012;**21**:675-679.
56. Sarre B, Ogoubemy M, Dotou C, et al. Epidemiological, therapeutic and prognostic aspects of breast cancer: about 473 cases collected in Hopital Principal de Dakar. *Dakar Med* 2006;**51**:92-6.
57. Stark A, Kleer CG, Martin I, et al. African Ancestry and Higher Prevalence of Triple-Negative Breast Cancer Findings From an International Study. *Cancer* 2010;**116**:4926-4932.
58. Togo A KL, Dembele BT, Traore A, Diakite I, Maiga A, Coulibaly AC, Diallo G. Cancer du sein dans deux centres hospitaliers de Bamako. Aspects epidemiologiques et diagnostiques. *Med Afr Noire* 2010;**57**:249-252.
59. Traore B, Keita M, Diane S, Dankoro A, Kabba IS, Keita N. Clinicopathological study of breast diseases presenting to the surgical oncology unit of Donka University Hospital in Conakry, Guinea. *West Afr J Med* 2012;**31**:227-31.

60. Ukwenya AY, Yusufu LMD, Nmadu PT, Garba ES, Ahmed A. Delayed treatment of symptomatic breast cancer: The experience from Kaduna, Nigeria. *S Afr J Surg* 2008;**46**(4):106-111.
61. Amir H, Azizi MR, Makwaya CK, Jessani S. TNM classification and breast cancer in an African population: a descriptive study. *Cent Afr J Med* 1997;**43**:357-359.
62. Bird PA, Hill AG, Houssami N. Poor hormone receptor expression in East African breast cancer: Evidence of a biologically different disease? *Ann Surg Oncol* 2008;**15**:1983-1988.
63. Burson AM, Soliman AS, Ngoma TA, et al. Clinical and epidemiologic profile of breast cancer in Tanzania. *Breast Dis* 2010;**31**:33-41.
64. Ersumo T. Breast Cancer in an Ethiopian Population, Addis Ababa. *East Cent Afr J Surg* 2006;**11**:81-86.
65. Galukande M, Wabinga H, Mirembe F, Karamagi C, Asea A. Difference in Risk Factors for Breast Cancer by ER Status in an Indigenous African Population. *ISRN Oncol* 2013;**2013**:463594.
66. Kantelhardt EJ, Zerche P, Mathewos A, et al. Breast cancer survival in Ethiopia: a cohort study of 1,070 women. *Int J Cancer* 2014;**135**:702-9.
67. Kenda JF, Chirimwami B, Veyi T. Clinicopathologic analysis of carcinoma of the breast in an African population. *Arch Surg* 1988;**123**:972-4.
68. Mbonde MP, Amir H, Schwartz-Albiez R, Akslen LA, Kitinya JN. Expression of estrogen and progesterone receptors in carcinomas of the female breast in Tanzania. *Oncol Rep* 2000;**7**:277-283.
69. Mody GN, Nduaguba A, Ntirenganya F, Riviello R. Characteristics and presentation of patients with breast cancer in Rwanda. *Am J Surg* 2013;**205**:409-413.
70. Muguti GI. Experience with breast cancer in Zimbabwe. *J R Coll Surg Edinb* 1993;**38**:75-8.
71. Nyagol J, Nyong'o A, Byakika B, et al. Routine assessment of hormonal receptor and Her-2/neu status underscores the need for more therapeutic targets in Kenyan women with breast cancer. *Anal Quant Cytol Histol* 2006;**28**:97-103.
72. Ojara EA. Carcinoma of the male breast in Mulago Hospital, Kampala. *East Afr Med J* 1978;**55**:489-91.
73. Pignon T, Ratsiaharovalala JJ, Randrianandriana S, et al. Breast Diseases in Women of 35 Years of Age, or Younger, in Madagascar- Clinical and Prognostic Analysis. *J Eur Radiother* 1988;**9**:121-129.
74. Rafaramino F, Rakotobe P, Pignon T. Management of breast cancer in Madagascar. *Cancer Radiother* 2001;**5**:445-51.
75. Rambau PF, Chalya PL, Manyama MM, Jackson KJ. Pathological features of Breast Cancer seen in Northwestern Tanzania: a nine years retrospective study. *BMC Res Notes* 2011;**4**:214.
76. Tesfamariam A, Gebremichael A, Mufunda J. Breast cancer clinicopathological presentation, gravity and challenges in Eritrea, East Africa: management practice in a resource-poor setting. *S Afr Med J* 2013;**103**:526-8.
77. Ariad S, Seymour L, Bezwoda WR. Platelet-derived growth factor (PDGF) in plasma of breast cancer patients: correlation with stage and rate of progression. *Breast Cancer Res Treat* 1991;**20**:11-7.
78. Dansey RD, Hessel PA, Browde S, et al. Lack of a significant independent effect of race on survival in breast cancer. *Cancer* 1988;**61**:1908-12.
79. du Toit RS, van Rensburg PS, Goedhals L. Paget's disease of the breast. *S Afr Med J* 1988;**73**:95-7.
80. Hacking EA, Dent DM, Gudgeon CA. Malignant tumours of the breast. Frequency distribution by age, race and stage at Groote Schuur Hospital, Cape Town, 1971-1981. *S Afr Med J* 1984;**65**:323-4.
81. Hoffman M, de Pinho H, Cooper D, et al. Breast cancer incidence and determinants of cancer stage in the Western Cape. *S Afr Med J* 2000;**90**:1212-1216.
82. Odendaal Jde V, Apffelstaedt JP. Limited surgery and tamoxifen in the treatment of elderly breast cancer patients. *World J Surg* 2003;**27**:125-9.
83. Ostyn C, Spector I, Bremner CG. Malignant breast tumours at Coronation Hospital, Johannesburg. A 10-year review. *S Afr Med J* 1987;**72**:528-9.
84. Pegoraro RJ, Soutter WP, Joubert SM, Nirmul D, Bryer JV. Nuclear and cytoplasmic oestrogen receptors in human mammary carcinoma. *S Afr Med J* 1980;**58**:807-813.
85. Pegoraro RJ, Nirmul D, Bryer JV. Clinical patterns of presentation of breast cancer in women of different racial groups in South Africa. *S Afr Med J* 1985;**68**:808-810.
86. Walker AR, Walker BF, Tshabalala EN, Isaacson C, Segal I. Low survival of South African urban black women with breast cancer. *Br J Cancer* 1984;**49**:241-4.
87. Walker ARP WB, Funani AJ, Walker S. Characteristics of black women with breast cancer in Soweto, South Africa. *Cancer J* 1989;**2**:316-319.
88. Walker ARP, Adam FI, Walker BF. Breast cancer in black African women: A changing situation. *J R Soc Promot Health* 2004;**124**:81-85.
89. Wasserman LJ, Apffelstaedt JP, Odendaal JV. Conservative management of breast cancer in the elderly in a developing country. *World J Surg Oncol* 2007;**5**:108.
